# Supplementary material
Source: MDPI journal article supplement (https://www.mdpi.com/2077-1312/11/4/734)

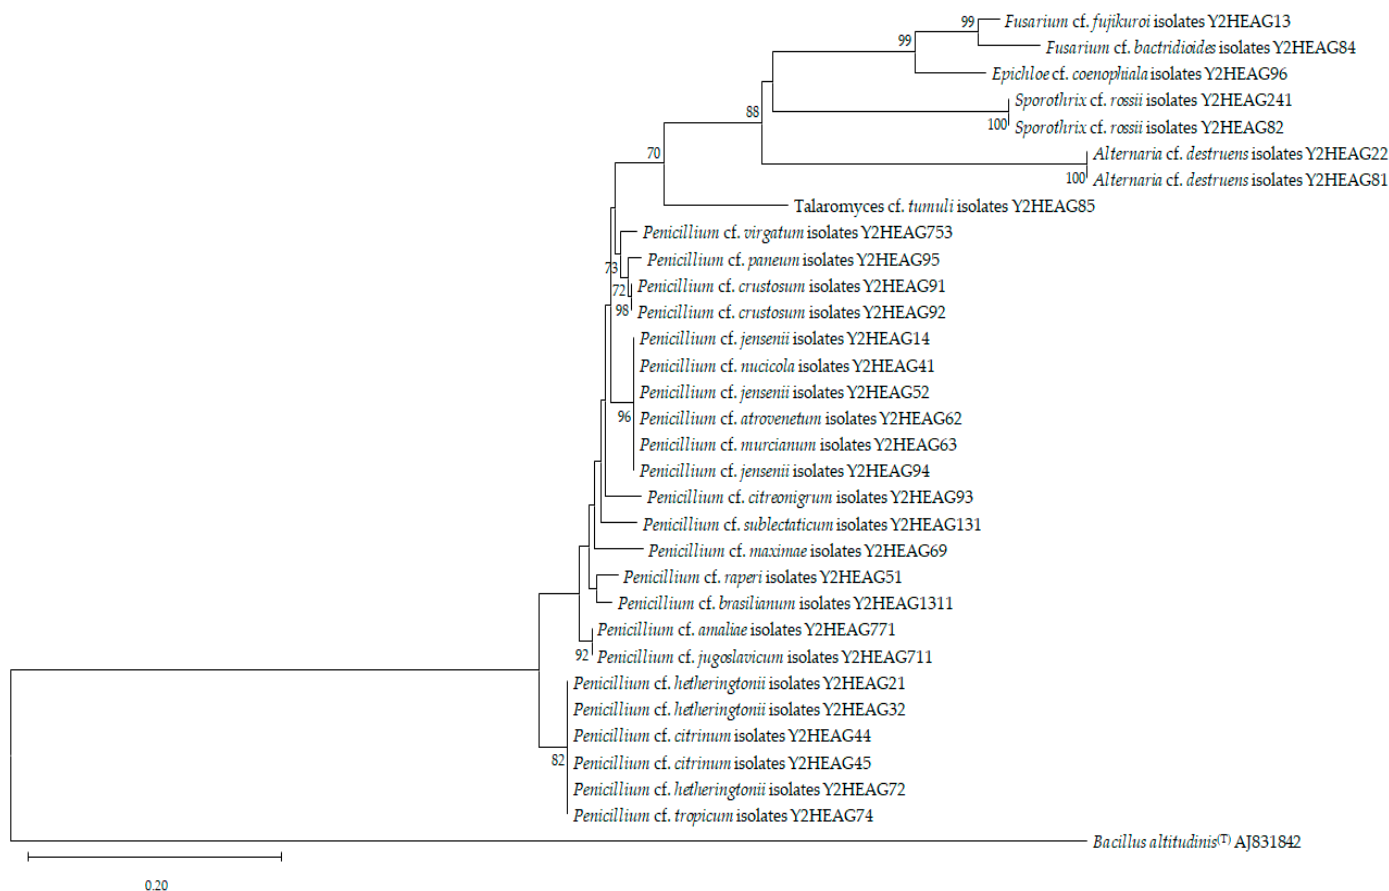

**Figure S1.** Phylogenetic relation of endophyte fungi in each host coastal plant species. (A) Phylogenetic tree of endophyte fungi in host species *Atriplex gmelinii*.

B) Phylogenic tree of endophyte fungi in host species *Aster sphathulifolius*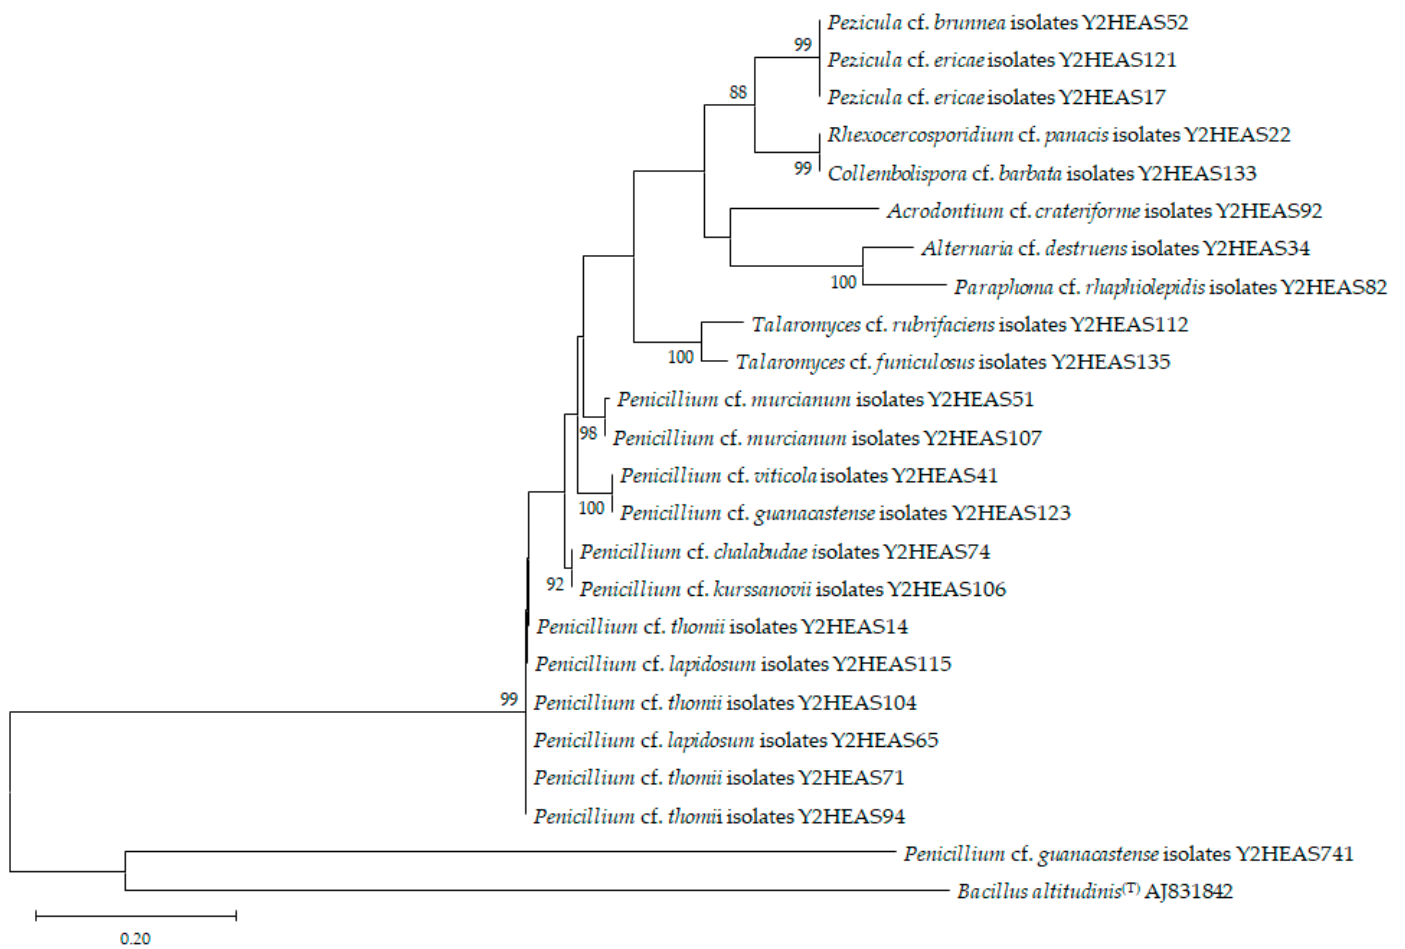

C) Phylogenic tree of endophyte fungi in host species *Artemisia scoparia*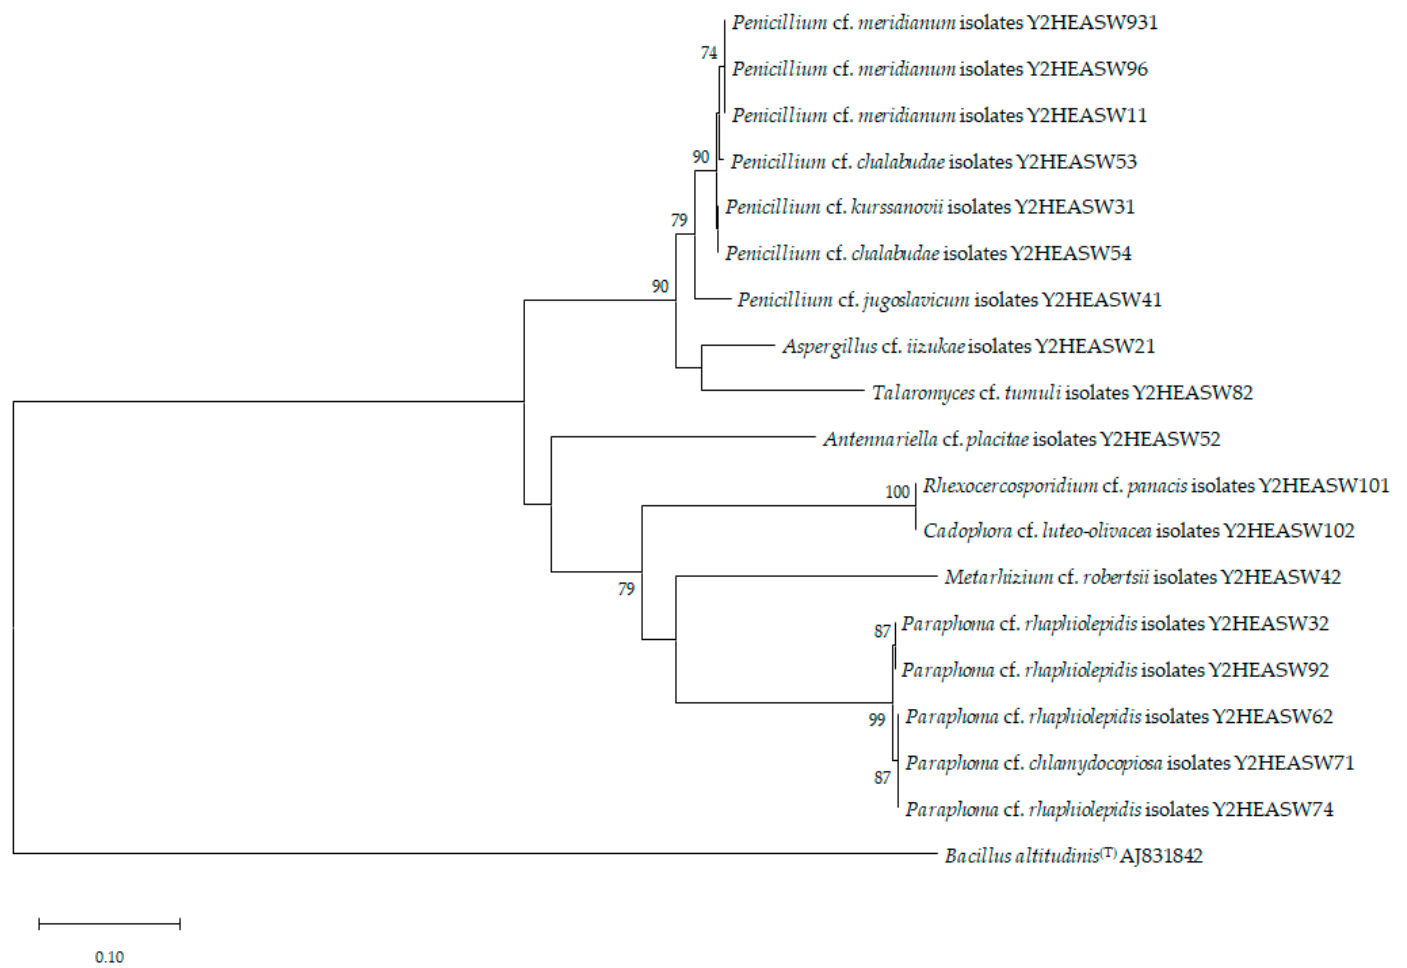

D) Phylogenic tree of endophyte fungi in host species *Cynodon dactylon*

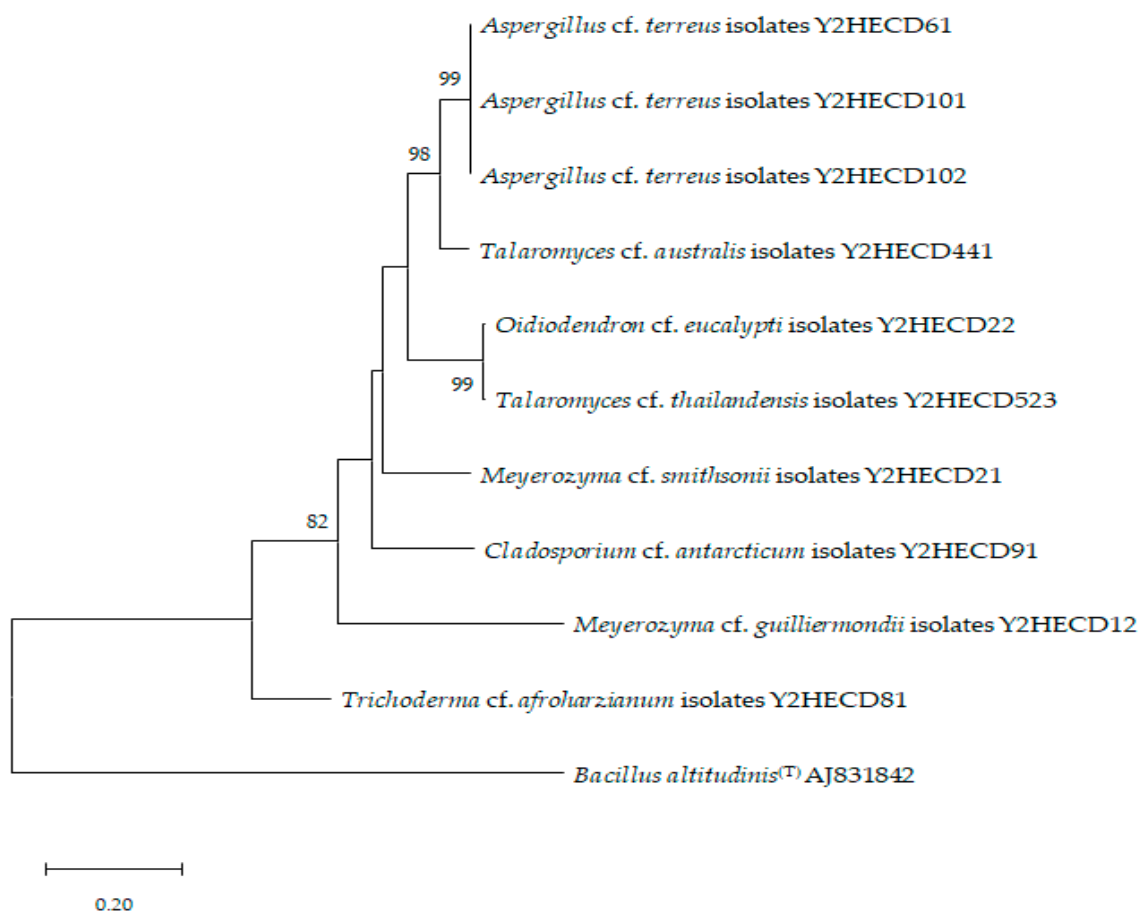

E) Phylogenic tree of endophyte fungi in host species *Cerastium fischerianum*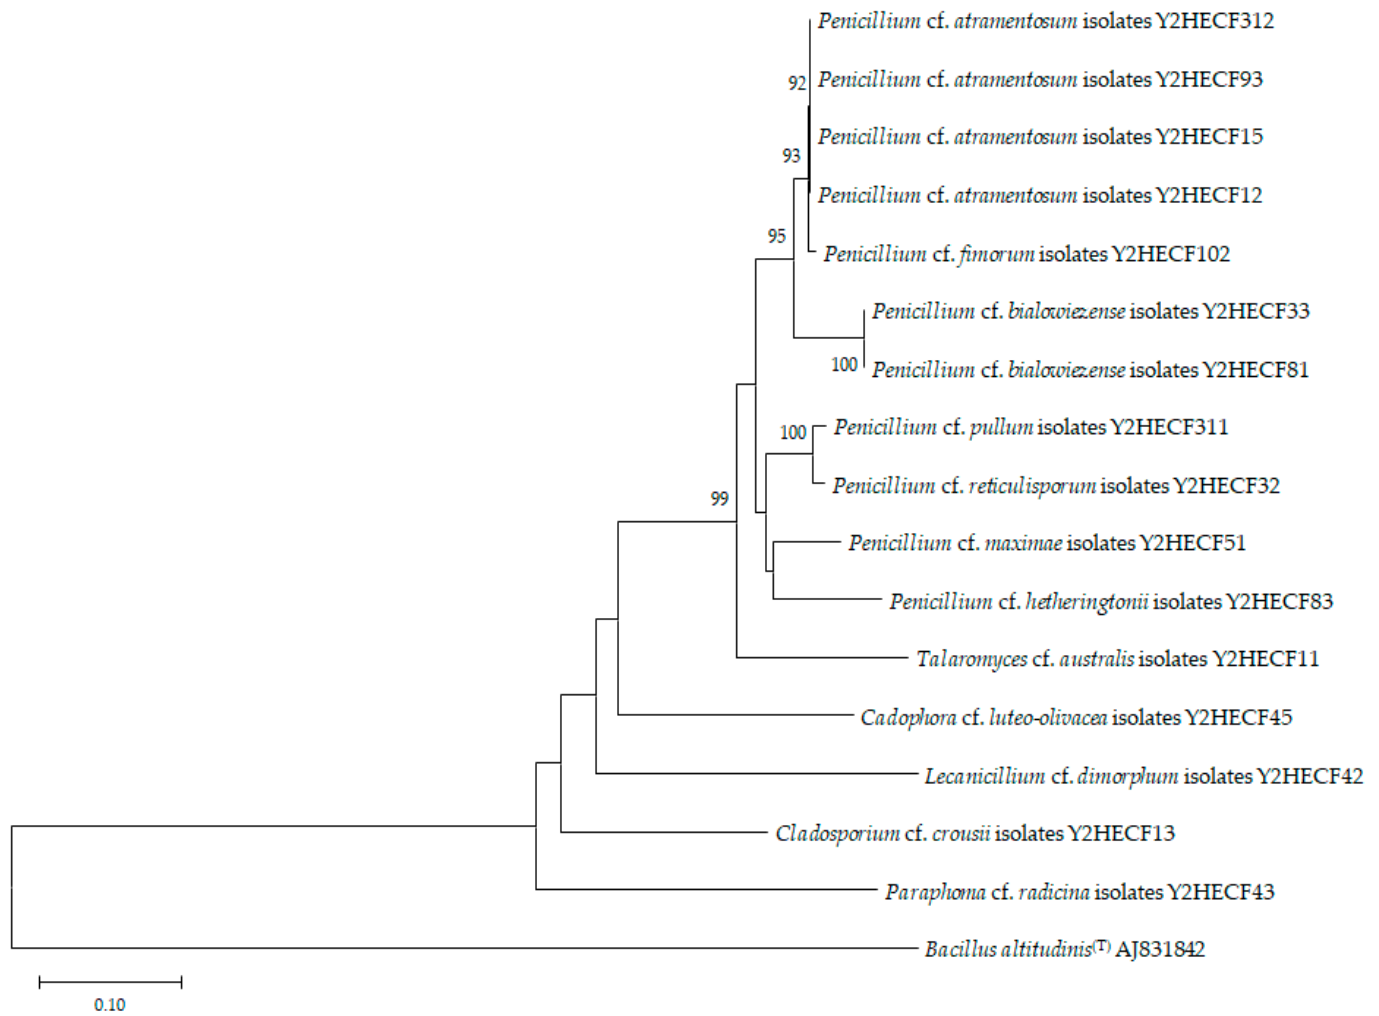

F) Phylogenic tree of endophyte fungi in host species *Carex kobomugi*

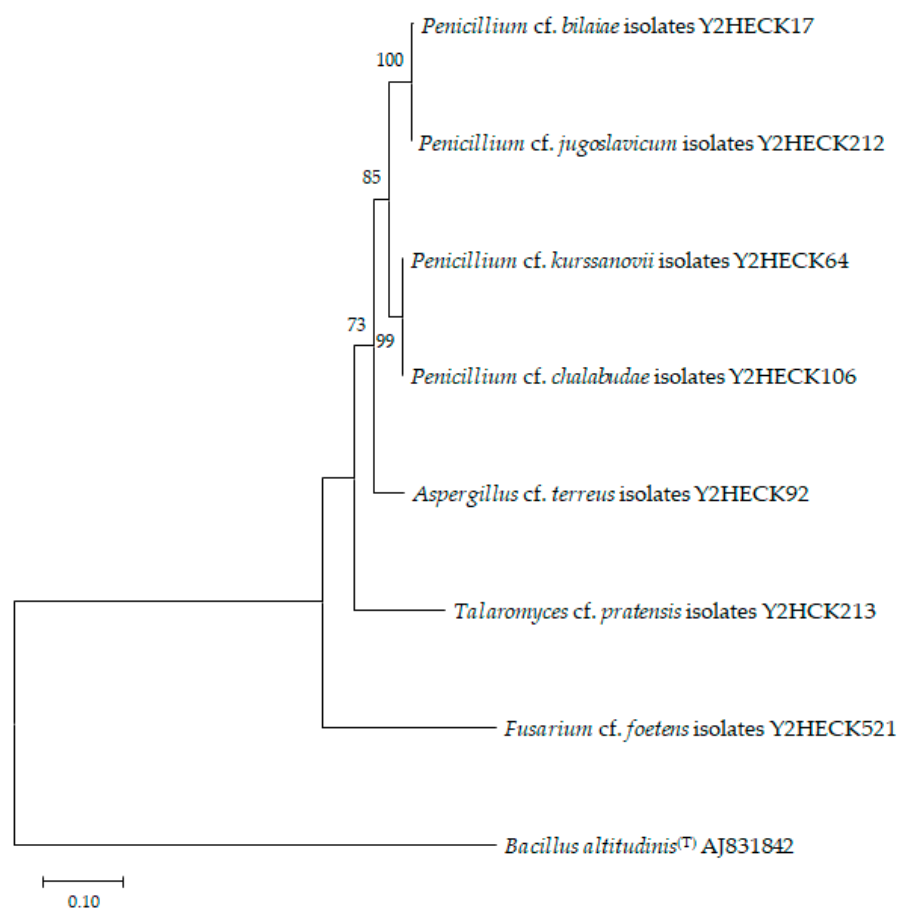

G) Phylogenic tree of endophyte fungi in host species *Carex pumila*

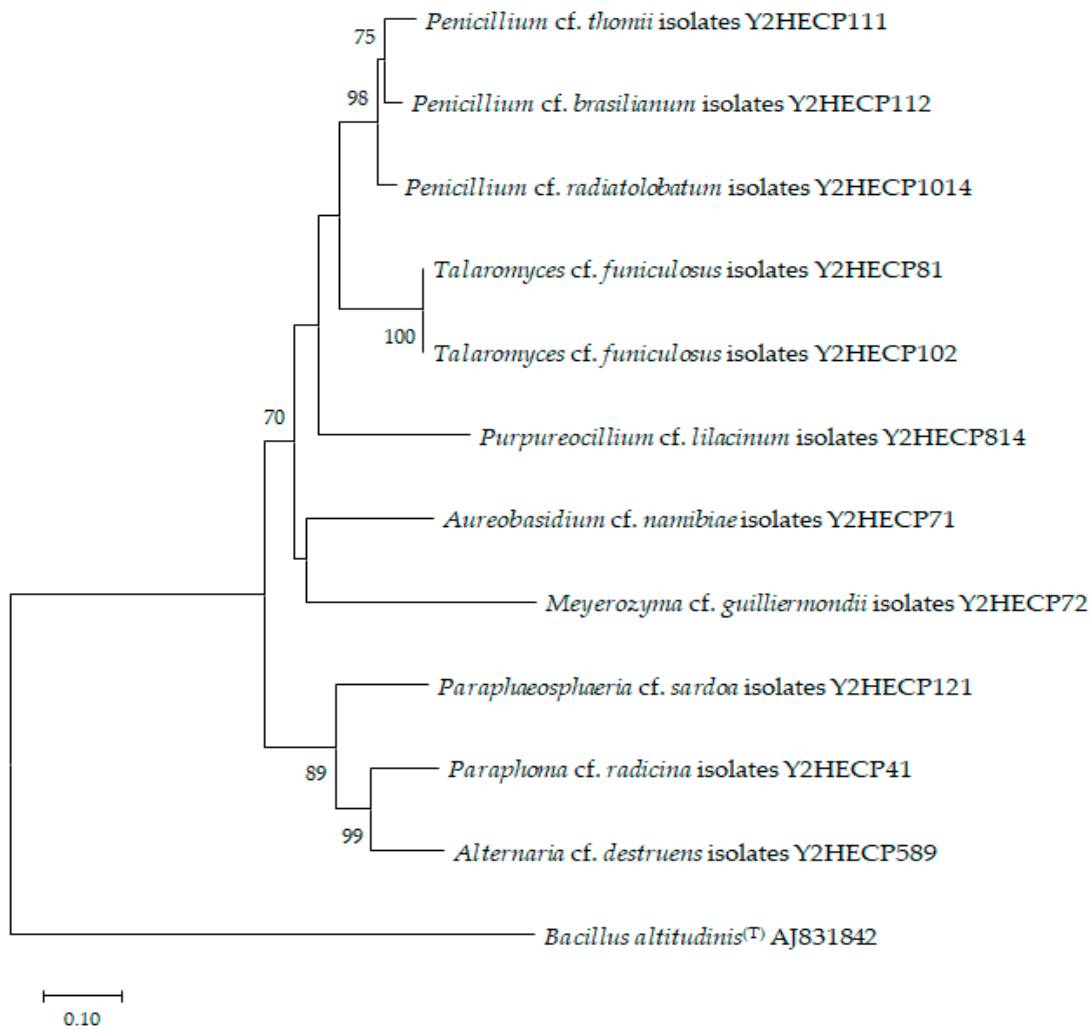

H) Phylogenic tree of endophyte fungi in host species *Cnidium japonicum*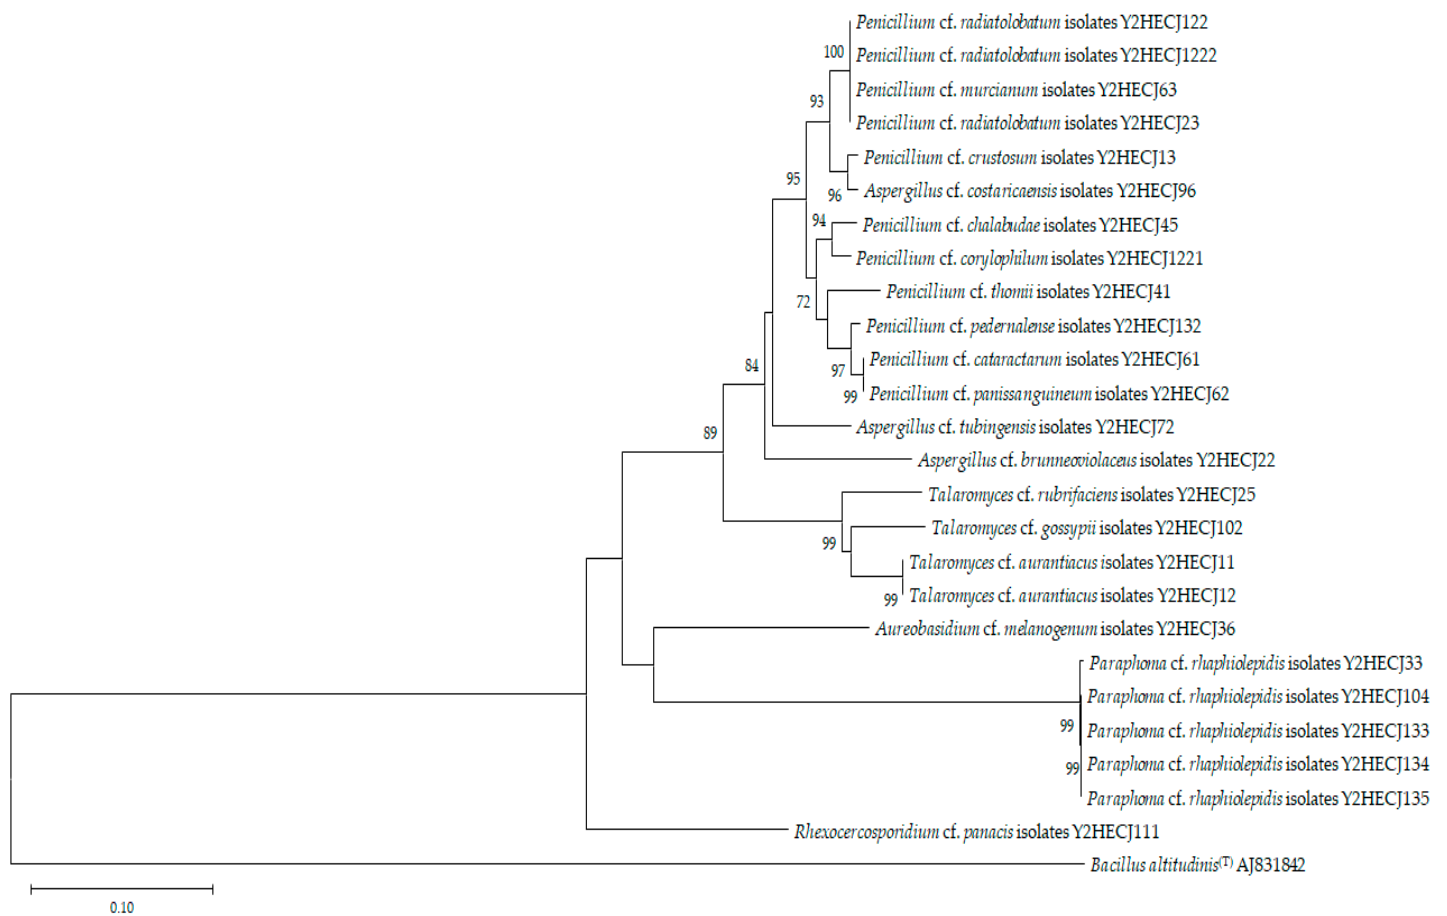



I) Phylogenetic tree of endophyte fungi in host species *Elymus mollis*

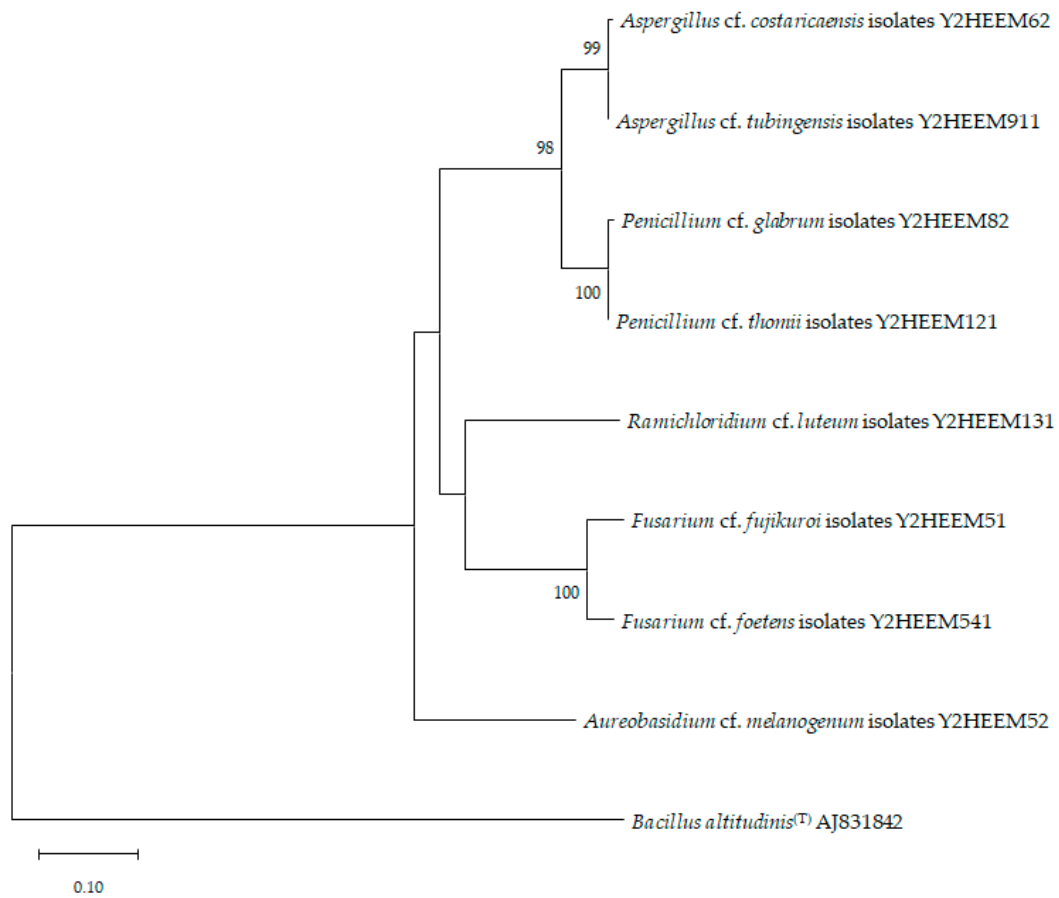

J) Phylogenetic tree of endophyte fungi in host species *Ischaemum antheophoroides*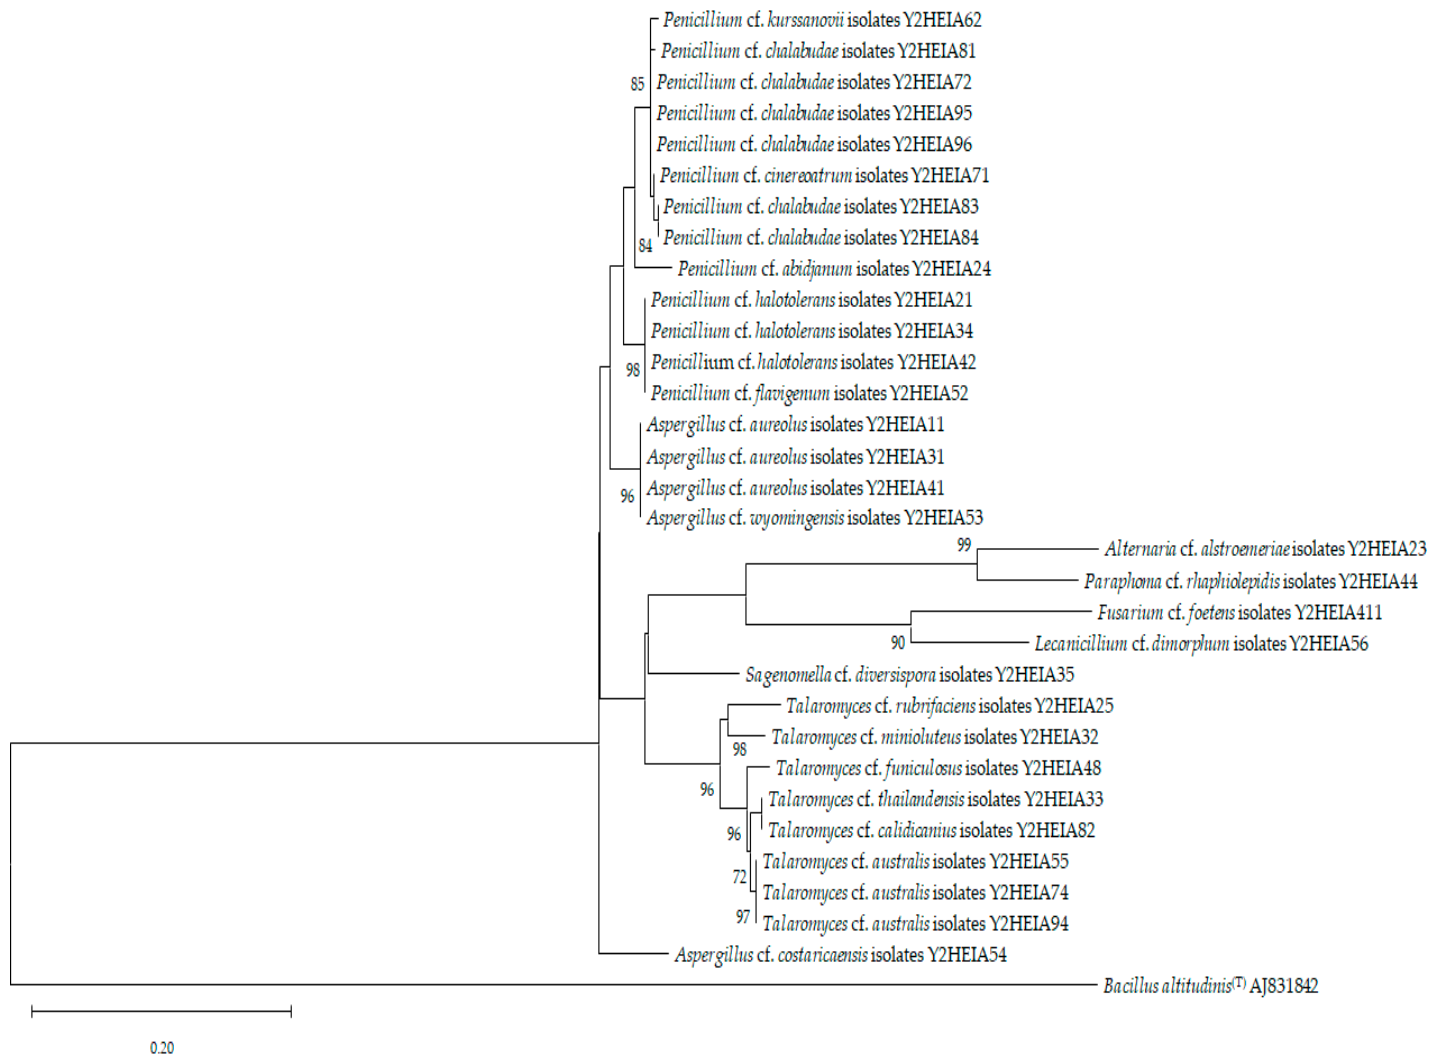

K) Phylogenic tree of endophyte fungi in host species *Linaria japonica*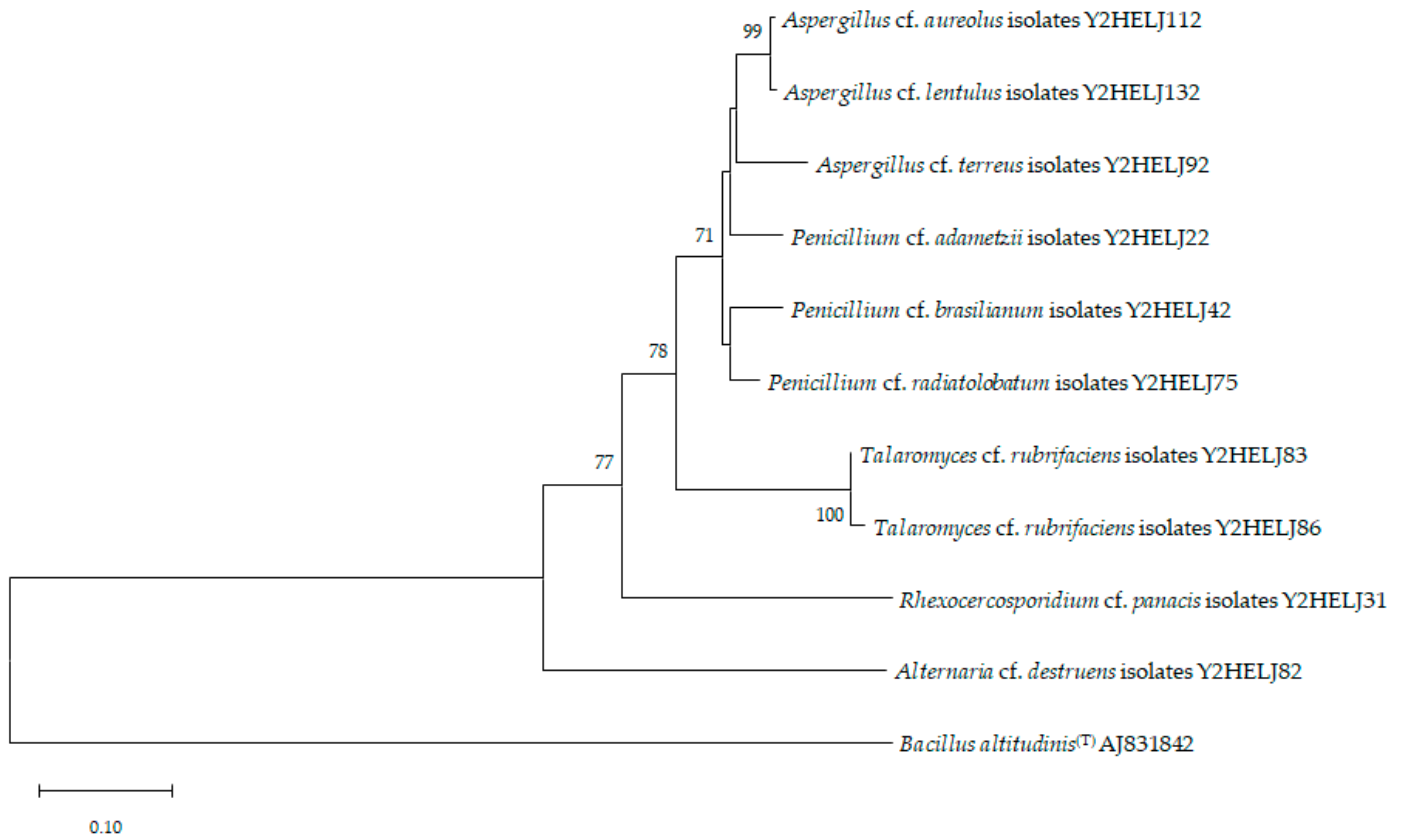

L) Phylogenic tree of endophyte fungi in host species *Lathyrus japonicus*

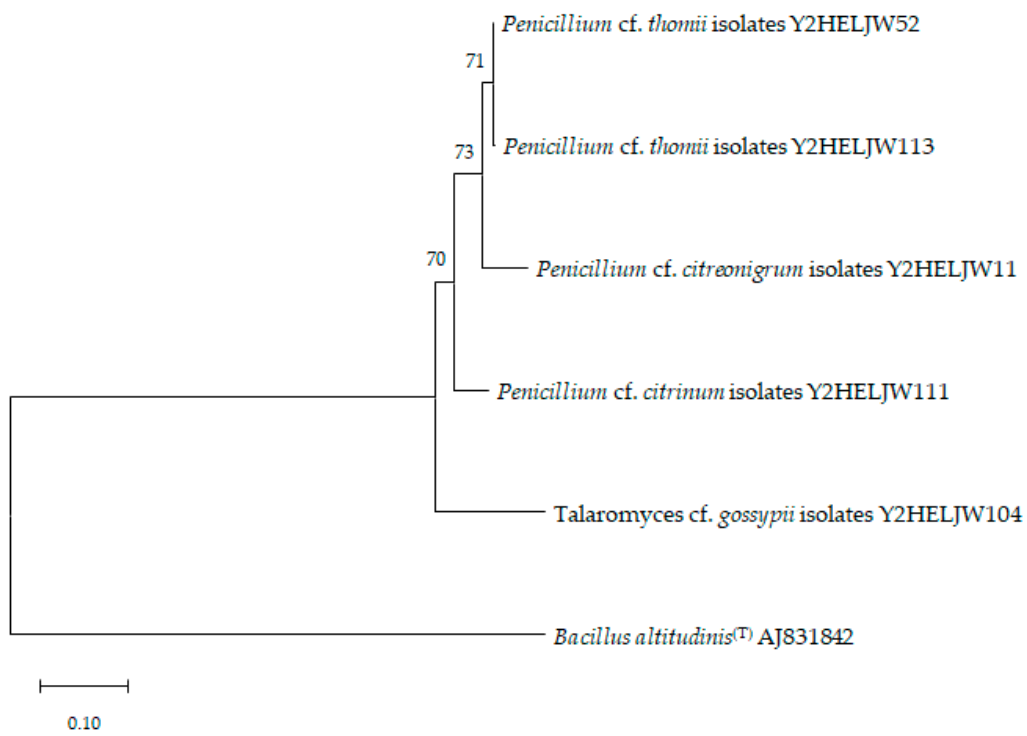

M) Phylogenic tree of endophyte fungi in host species *Lysimachia mauritiana*

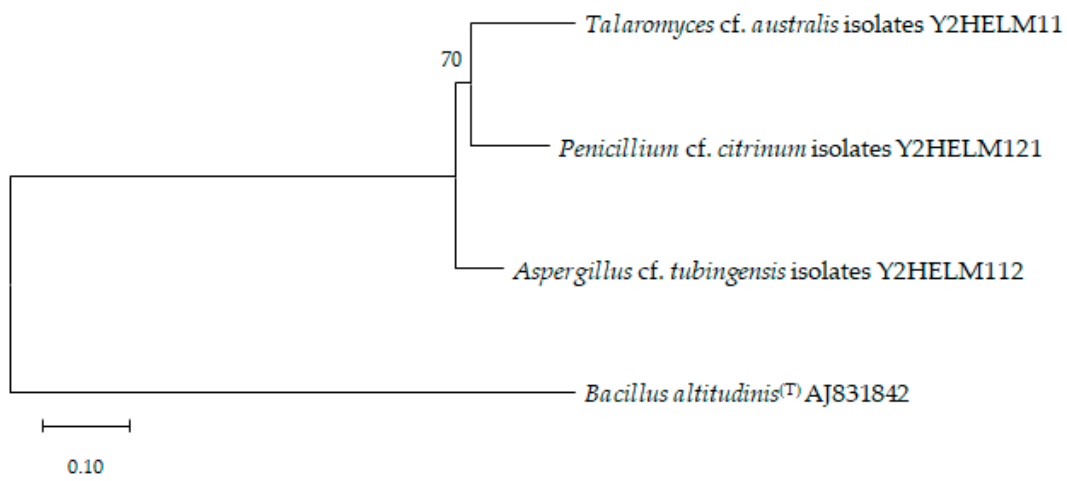

N) Phylogenetic tree of endophyte fungi in host species *Phragmites australis*

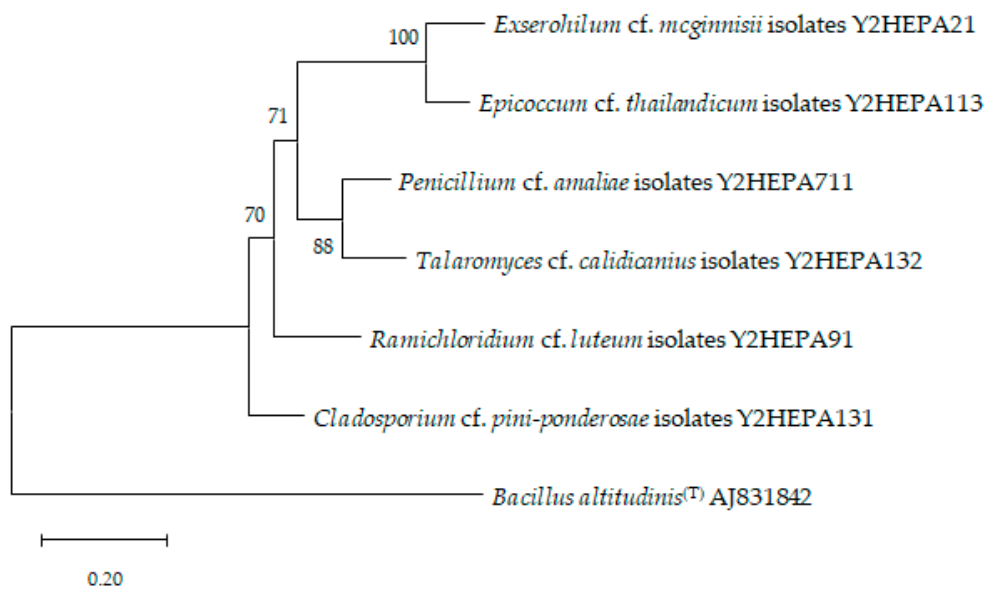

O) Phylogenic tree of endophyte fungi in host species *Plantago camtschatica*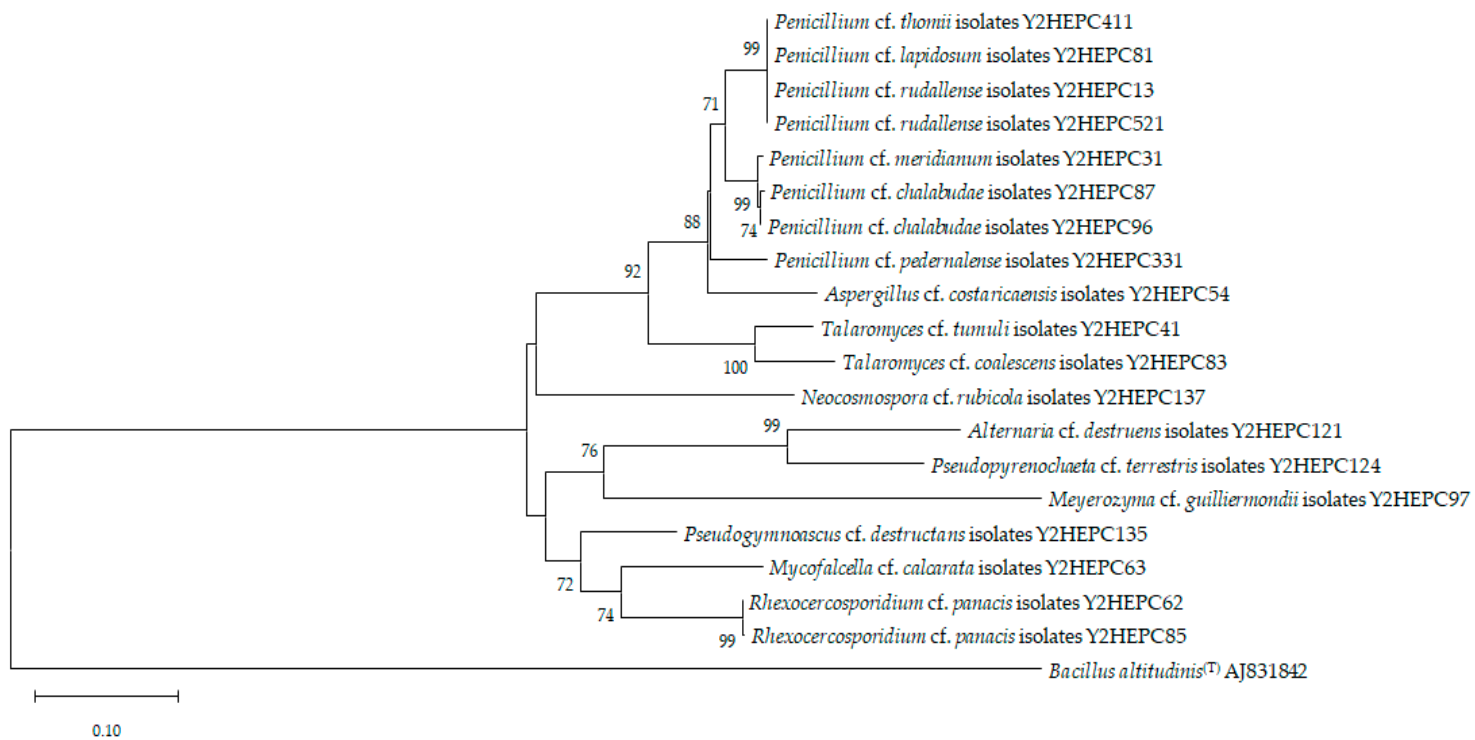

P) Phylogenic tree of endophyte fungi in host species *Pinus thunbergii*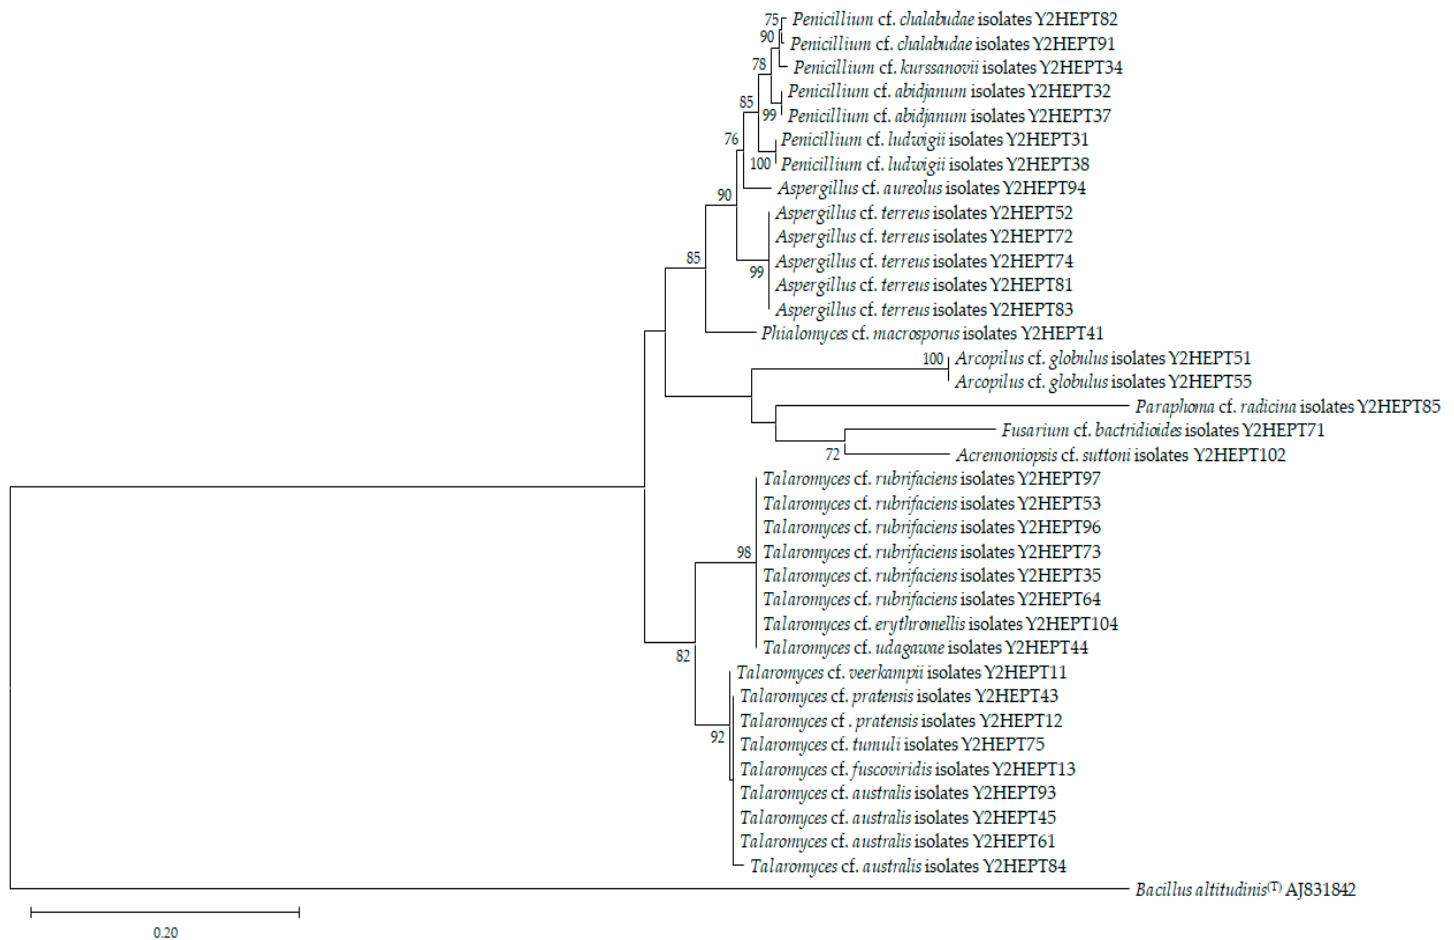



Q) Phylogenetic tree of endophyte fungi in host species *Rosa rugosa*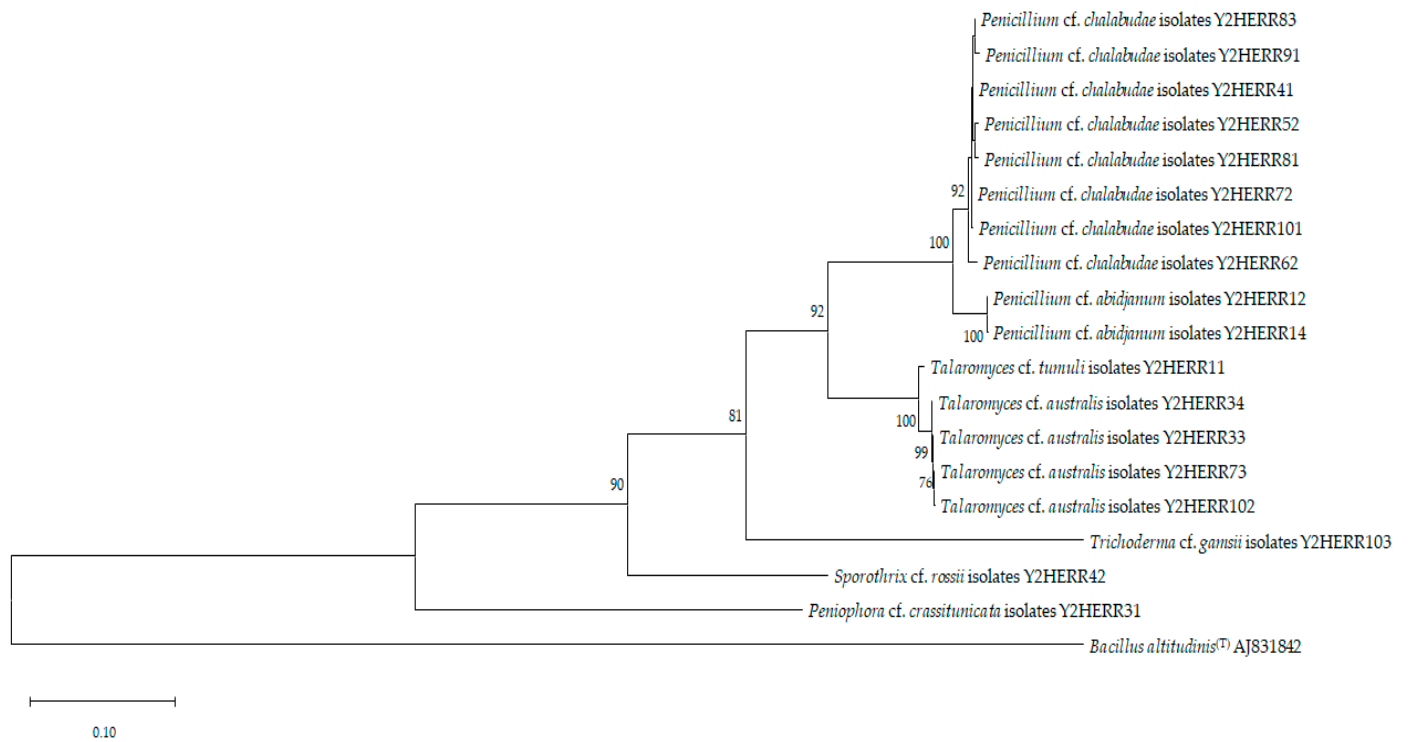

R) Phylogenic tree of endophyte fungi in host species *Sedum kamtschaticum*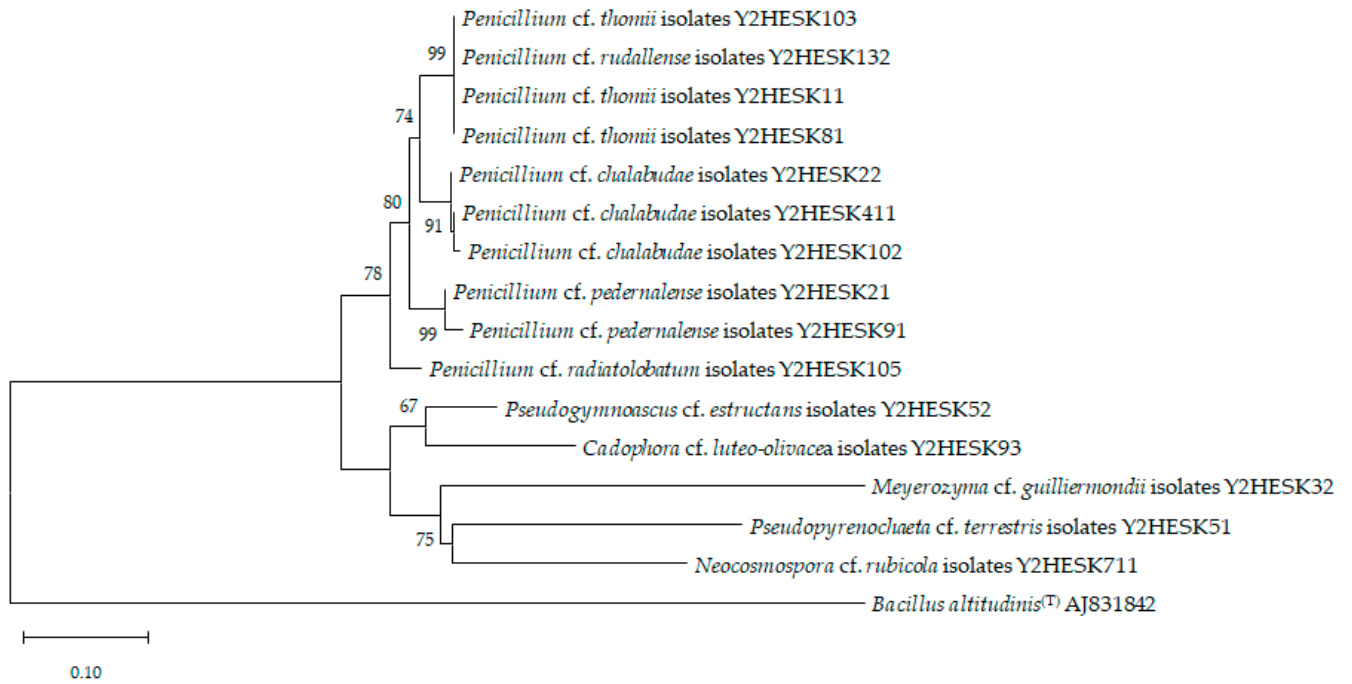

S) Phylogenic tree of endophyte fungi in host species *Spergularia marina*

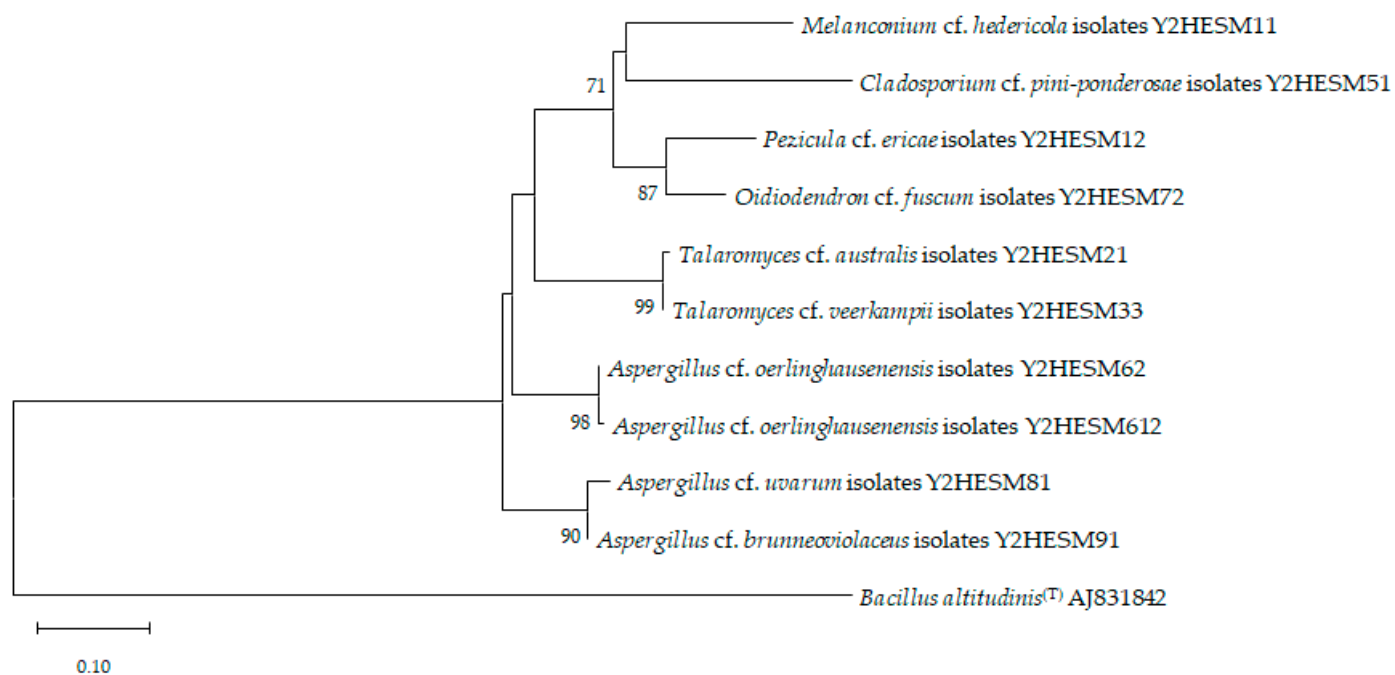

T) Phylogenic tree of endophyte fungi in host species *Sedum oryzifolium*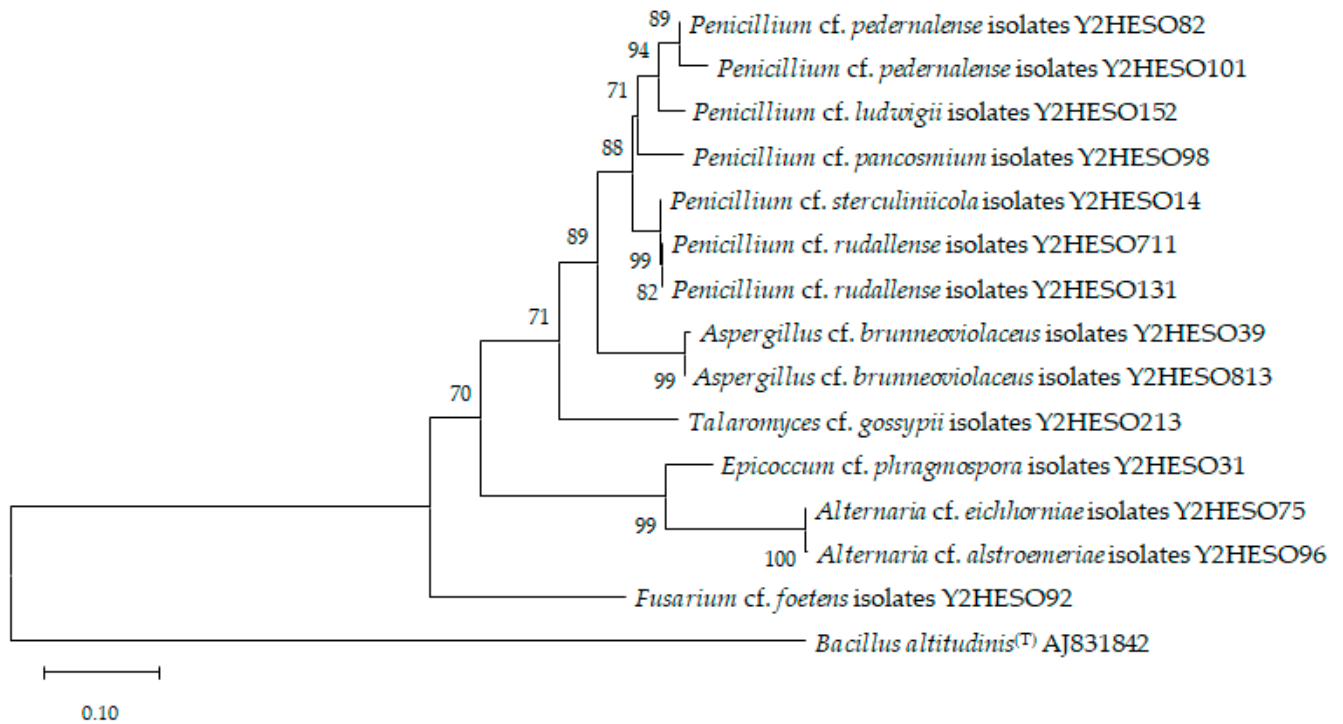

U) Phylogenetic tree of endophyte fungi in host species *Scutellaria strigillosa*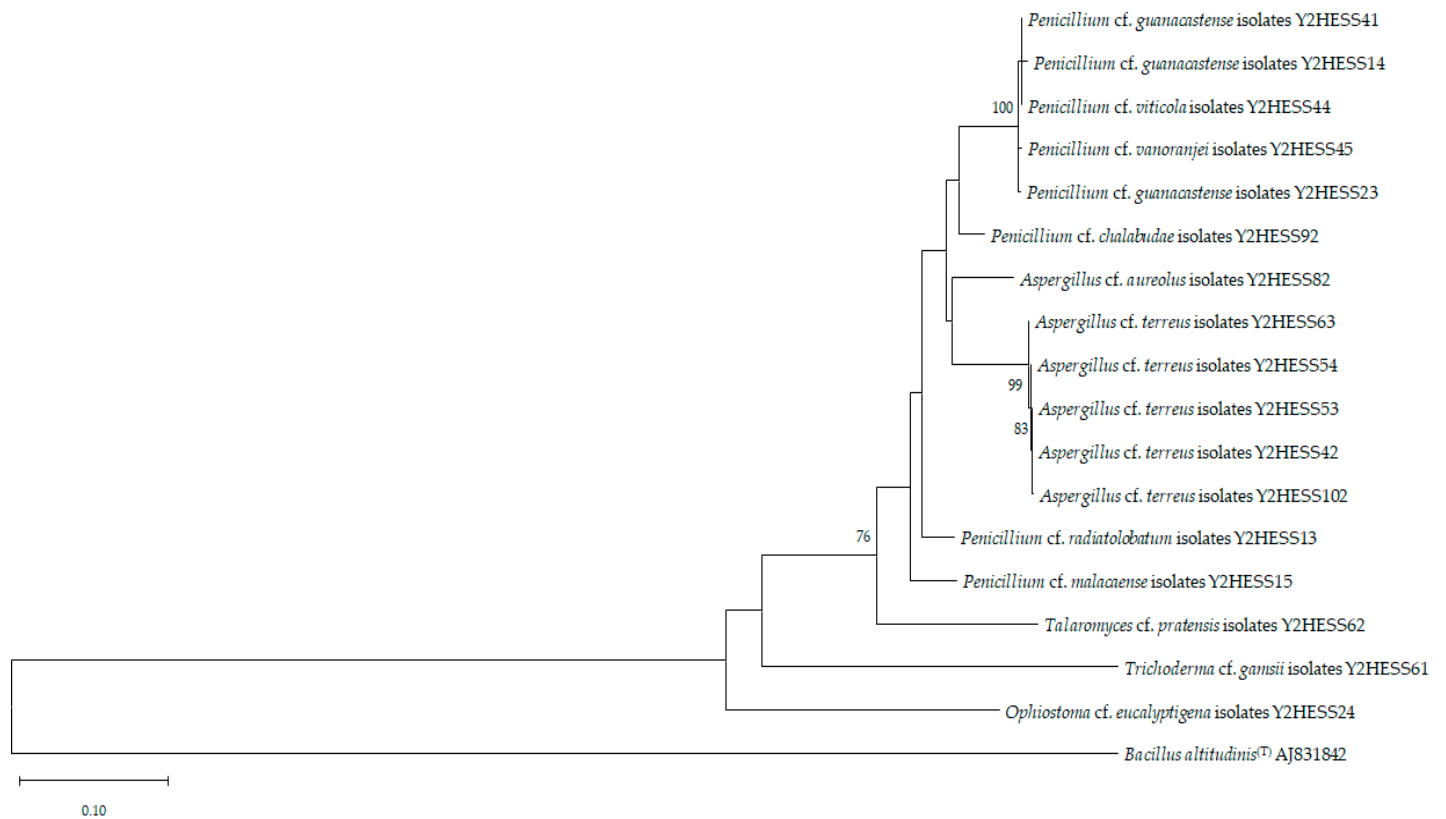

V) Phylogenic tree of endophyte fungi in host species *Setaria viridis*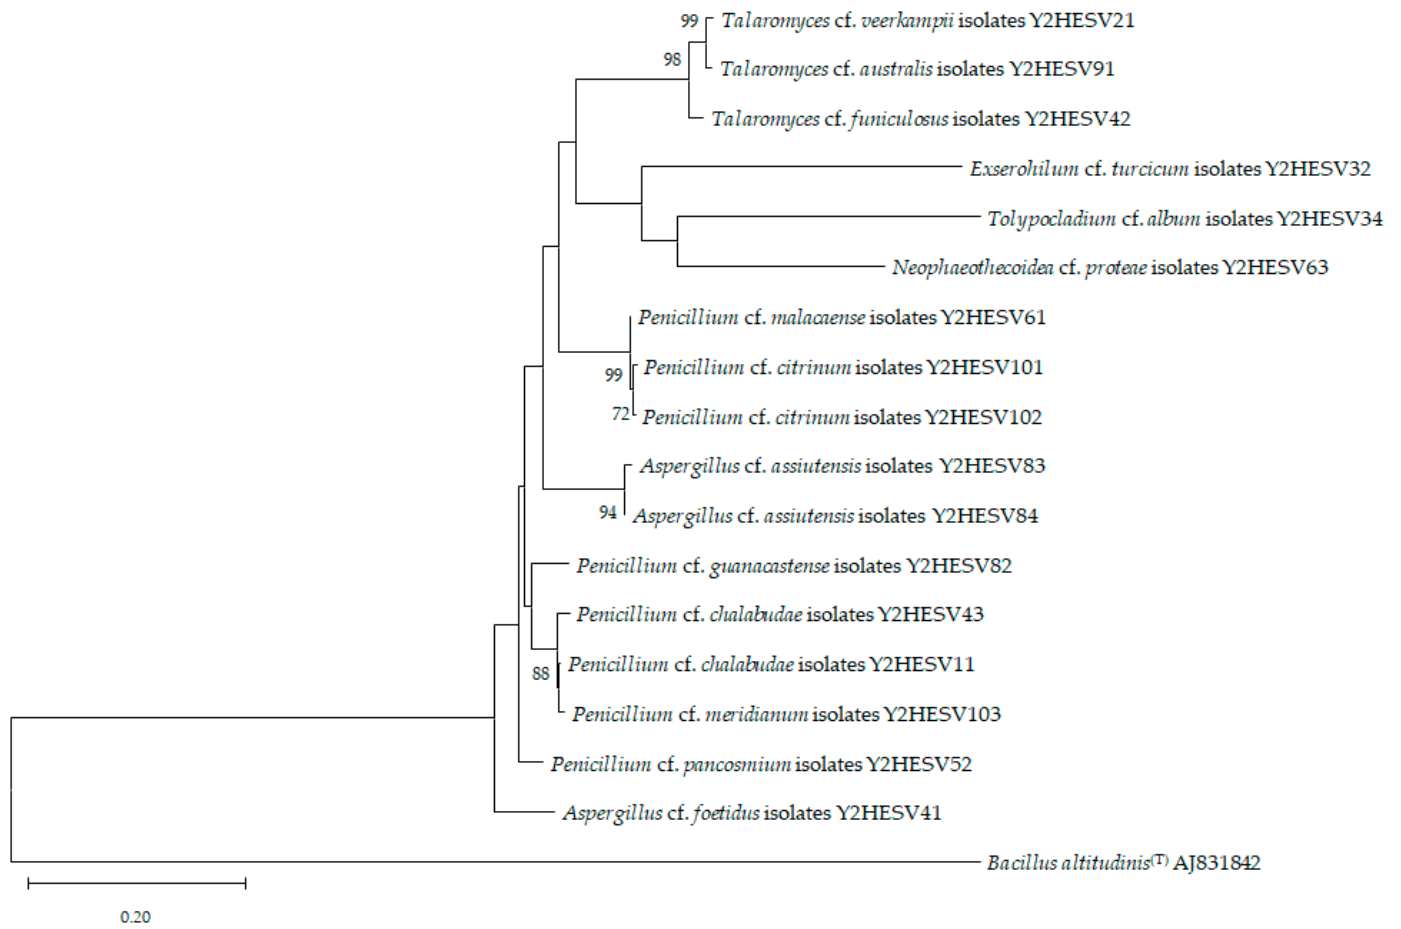

W) Phylogenic tree of endophyte fungi in host species *Vitex rotundifolia*

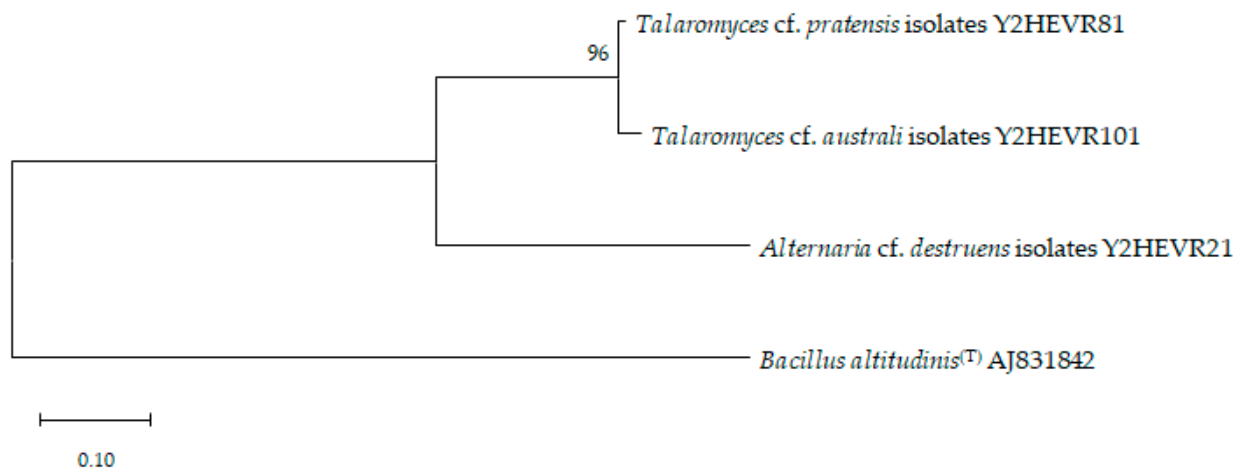

X) Phylogenic tree of endophyte fungi in host species *Zoysia sinica*

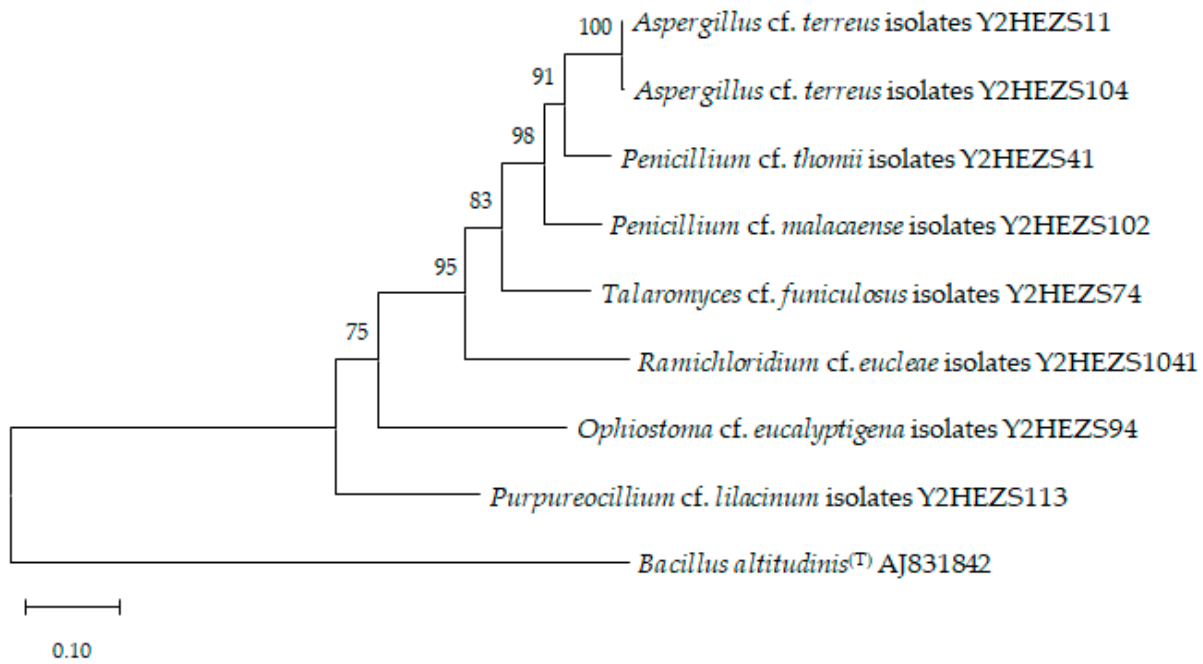

Supplement: s1 [file s1]
