# Supplementary material
Source: MDPI journal article supplement (https://www.mdpi.com/2077-1312/11/4/734)
Supplement: s1 [file s1]

Table S1. Fungal isolates and their taxonomic identity from each coastal plant species

| Halophyte species | Strain     | GenBank accession | Class                                           | Order           | Family           | Genus                                            | Closest relative based on sequence homology      | Similarity (%) |
|-------------------|------------|-------------------|-------------------------------------------------|-----------------|------------------|--------------------------------------------------|--------------------------------------------------|----------------|
| Atriplex gmelinii | Y2HEAG96   | JX238714          | Ascomycetes                                     | Hypocreales     | Clavicipitaceae  | <i>Epichloe</i>                                  | <i>Epichloe coenophiala</i> (T) (NR153968)       | 98             |
|                   | Y2HEAG22   | JX238689          | Dothideomycetes                                 | Pleosporales    | Pleosporaceae    | <i>Alternaria</i>                                | <i>Alternaria destruens</i> (T) (NR137143)       | 100            |
|                   | Y2HEAG81   | JX238705          |                                                 |                 |                  |                                                  | <i>Alternaria destruens</i> (T) (NR137143)       | 100            |
|                   | Y2HEAG85   | JX238708          | Eurotiomycetes                                  | Eurotiales      | Trichocomaceae   | <i>Talaromyces</i>                               | <i>Talaromyces tumuli</i> (T) (NR165528)         | 98             |
|                   | Y2HEAG241  | JX238690          |                                                 | Ophiostomatales | Ophiostomataceae | <i>Sporothrix</i>                                | <i>Sporothrix rossii</i> (T) (NR147597)          | 92             |
|                   | Y2HEAG82   | JX238706          |                                                 |                 |                  |                                                  | <i>Sporothrix rossii</i> (T) (NR147597)          | 92             |
|                   | Y2HEAG13   | JX238686          |                                                 |                 |                  | <i>Fusarium</i>                                  | <i>Fusarium fujikuroi</i> (T) (NR111889)         | 100            |
|                   | Y2HEAG84   | JX238707          |                                                 |                 |                  |                                                  | <i>Fusarium bactridioides</i> 90 (T) (NR120262)  | 99             |
|                   | Y2HEAG14   | JX238687          |                                                 |                 |                  |                                                  | <i>Penicillium jensenii</i> (T) (NR121297)       | 100            |
|                   | Y2HEAG21   | JX238688          |                                                 |                 |                  | <i>Penicillium hetheringtonii</i> (T) (NR111482) | 97                                               |                |
|                   | Y2HEAG32   | JX238691          |                                                 |                 |                  | <i>Penicillium hetheringtonii</i> (T) (NR111482) | 97                                               |                |
|                   | Y2HEAG41   | JX238692          |                                                 |                 |                  | <i>Penicillium nucicola</i> (T) (NR158824)       | 100                                              |                |
|                   | Y2HEAG44   | JX238693          |                                                 |                 |                  | <i>Penicillium citrinum</i> (T) (NR121224)       | 100                                              |                |
|                   | Y2HEAG45   | JX238694          |                                                 |                 |                  | <i>Penicillium citrinum</i> (T) (NR121224)       | 99                                               |                |
|                   | Y2HEAG51   | JX238695          |                                                 |                 |                  | <i>Penicillium raperi</i> (T) (NR121230)         | 100                                              |                |
|                   | Y2HEAG52   | JX238696          |                                                 |                 |                  | <i>Penicillium jensenii</i> (T) (NR121297)       | 100                                              |                |
|                   | Y2HEAG62   | JX238697          | Sordariomycetes                                 |                 |                  |                                                  | <i>Penicillium atrovenetum</i> (T) (NR121255)    | 100            |
|                   | Y2HEAG63   | JX238698          |                                                 |                 |                  |                                                  | <i>Penicillium murcianum</i> (T) (NR138358)      | 100            |
|                   | Y2HEAG69   | JX238699          |                                                 |                 |                  |                                                  | <i>Penicillium maximae</i> (T) (NR121343)        | 100            |
|                   | Y2HEAG72   | JX238700          |                                                 |                 |                  |                                                  | <i>Penicillium hetheringtonii</i> (T) (NR111482) | 98             |
|                   | Y2HEAG74   | JX238701          |                                                 |                 |                  |                                                  | <i>Penicillium tropicum</i> (T) (NR111485)       | 96             |
|                   | Y2HEAG753  | JX238702          |                                                 |                 |                  |                                                  | <i>Penicillium virgatum</i> (T) (NR077137)       | 98             |
|                   | Y2HEAG771  | JX238703          |                                                 |                 |                  |                                                  | <i>Penicillium amaliae</i> (T) (NR111767)        | 100            |
|                   | Y2HEAG711  | JX238704          |                                                 |                 |                  |                                                  | <i>Penicillium jugoslavicum</i> (T) (NR120269)   | 99             |
|                   | Y2HEAG91   | JX238709          |                                                 |                 |                  |                                                  | <i>Penicillium crustosum</i> (T) (NR077153)      | 100            |
|                   | Y2HEAG92   | JX238710          |                                                 |                 |                  |                                                  | <i>Penicillium crustosum</i> (T) (NR077153)      | 100            |
|                   | Y2HEAG93   | JX238711          | <i>Penicillium citreonigrum</i> (T) (NR138264)  | 100             |                  |                                                  |                                                  |                |
|                   | Y2HEAG94   | JX238712          | <i>Penicillium jensenii</i> (T) (NR121297)      | 100             |                  |                                                  |                                                  |                |
|                   | Y2HEAG95   | JX238713          | <i>Penicillium paneum</i> (T) (NR103620)        | 100             |                  |                                                  |                                                  |                |
|                   | Y2HEAG131  | JX238715          | <i>Penicillium sublectaticum</i> (T) (NR137916) | 100             |                  |                                                  |                                                  |                |
|                   | Y2HEAG1311 | JX238716          | <i>Penicillium brasilianum</i> (T) (NR111499)   | 98              |                  |                                                  |                                                  |                |

Table S1. Fungal isolates and their taxonomic identity from each coastal plant species

| Halophyte species       | Strain    | GenBank accession | Class                                           | Order             | Family                                | Genus                      | Closest relative based on sequence homology       | Similarity (%) |
|-------------------------|-----------|-------------------|-------------------------------------------------|-------------------|---------------------------------------|----------------------------|---------------------------------------------------|----------------|
| Aster<br>spathulifolius | Y2HEAS92  | JX238729          | Ascomycetes                                     | Mycosphaerellales | Teratosphaeriaceae                    | <i>Acrodontium</i>         | <i>Acrodontium crateriforme</i> (T) (NR152320)    | 95             |
|                         | Y2HEAS22  | JX238719          |                                                 |                   | Dissoconiaceae                        | <i>Rhexocercosporidium</i> | <i>Rhexocercosporidium panacis</i> (T) (NR119568) | 97             |
|                         | Y2HEAS82  | JX238728          | Dothideomycetes                                 | Pleosporales      | Phaeosphaeriaceae                     | <i>Paraphoma</i>           | <i>Paraphoma raphiolepidis</i> (T) (NR154373)     | 96             |
|                         | Y2HEAS34  | JX238720          |                                                 |                   | Pleosporaceae                         | <i>Alternaria</i>          | <i>Alternaria destruens</i> (T) (NR137143)        | 99             |
|                         | Y2HEAS112 | JX238734          | Eurotiomycetes                                  | Eurotiales        | Trichocomaceae                        | <i>Talaromyces</i>         | <i>Talaromyces rubrifaciens</i> (T) (NR164482)    | 96             |
|                         | Y2HEAS135 | JX238739          |                                                 |                   |                                       |                            | <i>Talaromyces funiculosus</i> (T) (NR103678)     | 100            |
|                         | Y2HEAS133 | JX238738          | Leotiomycetes                                   | Helotiales        | Helotiales incertae sedis             | <i>Collembolispora</i>     | <i>Collembolispora barbata</i> (T) (NR111443)     | 100            |
|                         | Y2HEAS17  | JX238718          |                                                 |                   | Dermateaceae                          | <i>Pezicula</i>            | <i>Pezicula ericae</i> (T) (NR155653)             | 99             |
|                         | Y2HEAS52  | JX238723          | <i>Pezicula brunnea</i> (T) (NR155652)          | 99                |                                       |                            |                                                   |                |
|                         | Y2HEAS121 | JX238736          |                                                 |                   | <i>Pezicula ericae</i> (T) (NR155653) | 100                        |                                                   |                |
|                         | Y2HEAS14  | JX238717          | Sordariomycetes                                 | Hypocreales       | Nectriaceae                           | <i>Penicillium</i>         | <i>Penicillium thomii</i> (T) (NR077159)          | 100            |
|                         | Y2HEAS41  | JX238721          |                                                 |                   |                                       |                            | <i>Penicillium viticola</i> (T) (NR121209)        | 100            |
|                         | Y2HEAS51  | JX238722          |                                                 |                   |                                       |                            | <i>Penicillium murcianum</i> (T) (NR138358)       | 100            |
|                         | Y2HEAS65  | JX238724          |                                                 |                   |                                       |                            | <i>Penicillium lapidosum</i> (T) (NR121223)       | 100            |
|                         | Y2HEAS71  | JX238725          |                                                 |                   |                                       |                            | <i>Penicillium thomii</i> (T) (NR077159)          | 99             |
|                         | Y2HEAS74  | JX238726          |                                                 |                   |                                       |                            | <i>Penicillium chalabudae</i> (T) (NR144845)      | 100            |
|                         | Y2HEAS741 | JX238727          |                                                 |                   |                                       |                            | <i>Penicillium guanacastense</i> (T) (NR111673)   | 97             |
|                         | Y2HEAS94  | JX238730          |                                                 |                   |                                       |                            | <i>Penicillium thomii</i> (T) (NR077159)          | 100            |
|                         | Y2HEAS104 | JX238731          |                                                 |                   |                                       |                            | <i>Penicillium thomii</i> (T) (NR077159)          | 99             |
|                         | Y2HEAS106 | JX238732          |                                                 |                   |                                       |                            | <i>Penicillium kurssanovii</i> (T) (NR138278)     | 100            |
|                         | Y2HEAS107 | JX238733          |                                                 |                   |                                       |                            | <i>Penicillium murcianum</i> (T) (NR138358)       | 100            |
|                         | Y2HEAS115 | JX238735          |                                                 |                   |                                       |                            | <i>Penicillium lapidosum</i> (T) (NR121223)       | 100            |
|                         | Y2HEAS123 | JX238737          | <i>Penicillium guanacastense</i> (T) (NR111673) | 98                |                                       |                            |                                                   |                |

Table S1. Fungal isolates and their taxonomic identity from each coastal plant species

| Halophyte species  | Strain     | GenBank accession | Class           | Order             | Family                    | Genus                      | Closest relative based on sequence homology       | Similarity (%) |
|--------------------|------------|-------------------|-----------------|-------------------|---------------------------|----------------------------|---------------------------------------------------|----------------|
| Artemisia scoparia | Y2HEASW102 | JX238757          | Ascomycetes     | Helotiales        | Helotiales incertae sedis | <i>Cadophora</i>           | <i>Cadophora luteo-olivacea</i> (T) (NR165945)    | 95             |
|                    | Y2HEASW101 | JX238756          |                 | Mycosphaerellales | Dissociaceae              | <i>Rhexocercosporidium</i> | <i>Rhexocercosporidium panacis</i> (T) (NR119568) | 99             |
|                    | Y2HEASW52  | JX238746          |                 | Capnodiales       | Capnodiaceae              | <i>Antennariella</i>       | <i>Antennariella placitae</i> (T) (NR132831)      | 95             |
|                    | Y2HEASW32  | JX238743          | Dothideomycetes | Pleosporales      | Phaeosphaeriaceae         | <i>Paraphoma</i>           | <i>Paraphoma raphiolepidis</i> (T) (NR154373)     | 100            |
|                    | Y2HEASW62  | JX238749          |                 |                   |                           |                            | <i>Paraphoma raphiolepidis</i> (T) (NR154373)     | 97             |
|                    | Y2HEASW71  | JX238750          |                 |                   |                           |                            | <i>Paraphoma chlamydopiosa</i> (T) (NR154343)     | 96             |
|                    | Y2HEASW74  | JX238751          |                 |                   |                           |                            | <i>Paraphoma raphiolepidis</i> (T) (NR154373)     | 100            |
|                    | Y2HEASW92  | JX238753          |                 |                   |                           |                            | <i>Paraphoma raphiolepidis</i> (T) (NR154373)     | 100            |
|                    | Y2HEASW82  | JX238752          |                 |                   |                           |                            | <i>Talaromyces tumuli</i> (T) (NR165528)          | 98             |
|                    | Y2HEASW21  | JX238741          | Eurotiomycetes  | Eurotiales        | Trichocomaceae            | <i>Talaromyces</i>         | <i>Aspergillus iizukae</i> (T) (NR135398)         | 100            |
|                    | Y2HEASW42  | JX238745          |                 |                   |                           | <i>Aspergillus</i>         | <i>Aspergillus iizukae</i> (T) (NR135398)         | 100            |
|                    | Y2HEASW11  | JX238740          | Sordariomycetes | Hypocreales       | Nectriaceae               | <i>Metarhizium</i>         | <i>Metarhizium robertsii</i> (T) (NR132011)       | 100            |
|                    | Y2HEASW31  | JX238742          |                 |                   |                           | <i>Penicillium</i>         | <i>Penicillium meridianum</i> (T) (NR121237)      | 100            |
|                    | Y2HEASW41  | JX238744          |                 |                   |                           |                            | <i>Penicillium kurssanovii</i> (T) (NR138278)     | 100            |
|                    | Y2HEASW53  | JX238747          |                 |                   |                           |                            | <i>Penicillium jugoslavicum</i> (T) (NR120269)    | 100            |
|                    | Y2HEASW54  | JX238748          |                 |                   |                           |                            | <i>Penicillium chlabudae</i> (T) (NR144845)       | 100            |
|                    | Y2HEASW931 | JX238754          |                 |                   |                           |                            | <i>Penicillium chlabudae</i> (T) (NR144845)       | 100            |
|                    | Y2HEASW96  | JX238755          |                 |                   |                           |                            | <i>Penicillium meridianum</i> (T) (NR121237)      | 100            |
|                    |            |                   |                 |                   |                           |                            | <i>Penicillium meridianum</i> (T) (NR121237)      | 100            |

Table S1. Fungal isolates and their taxonomic identity from each coastal plant species

| Halophyte species | Strain    | GenBank accession | Class           | Order             | Family             | Genus               | Closest relative based on sequence homology     | Similarity (%) |
|-------------------|-----------|-------------------|-----------------|-------------------|--------------------|---------------------|-------------------------------------------------|----------------|
| Cynodon dactylon  | Y2HECD12  | JX238758          | Dothideomycetes | Capnodiales       | Davidiellaceae     | <i>Cladosporium</i> | <i>Cladosporium antarcticum</i> (T) (NR121332)  | 95             |
|                   | Y2HECD21  | JX238759          | Eurotiomycetes  | Eurotiales        | Trichocomaceae     | <i>Talaromyces</i>  | <i>Talaromyces australis</i> (T) (NR147431)     | 99             |
|                   | Y2HECD22  | JX238760          |                 |                   |                    |                     | <i>Talaromyces thailandensis</i> (T) (NR147428) | 100            |
|                   | Y2HECD441 | JX238761          |                 |                   |                    | <i>Aspergillus</i>  | <i>Aspergillus terreus</i> (T) (NR131276)       | 99             |
|                   | Y2HECD523 | JX238762          |                 |                   |                    |                     | <i>Aspergillus terreus</i> (T) (NR131276)       | 100            |
|                   | Y2HECD61  | JX238763          |                 |                   |                    |                     | <i>Aspergillus terreus</i> (T) (NR131276)       | 100            |
|                   | Y2HECD81  | JX238764          | Leotiomycetes   | Helotiales        | Myxotrichaceae     | <i>Oidiodendron</i> | <i>Oidiodendron eucalypti</i> (T) (NR160624)    | 97             |
|                   | Y2HECD91  | JX238765          | Saccharomycetes | Saccharomycetales | Saccharomycetaceae | <i>Meyerozyma</i>   | <i>Meyerozyma guilliermondii</i> (T) (NR111247) | 98             |
|                   | Y2HECD101 | JX238766          |                 |                   |                    |                     | <i>Meyerozyma smithsonii</i> (T) (NR111339)     | 99             |
|                   | Y2HECD102 | JX238767          |                 | Hypocreales       | Hypocreaceae       | <i>Trichoderma</i>  | <i>Trichoderma afroharzianum</i> (T) (NR137304) | 100            |

Table S1. Fungal isolates and their taxonomic identity from each coastal plant species

| Halophyte species      | Strain    | GenBank accession | Class           | Order        | Family                    | Genus               | Closest relative based on sequence homology      | Similarity (%) |
|------------------------|-----------|-------------------|-----------------|--------------|---------------------------|---------------------|--------------------------------------------------|----------------|
| Cerastium fischerianum | Y2HECF45  | JX238778          | Ascomycetes     | Helotiales   | Helotiales incertae sedis | <i>Cadophora</i>    | <i>Cadophora luteo-olivacea</i> (T) (NR165945)   | 99             |
|                        | Y2HECF43  | JX238777          | Dothideomycetes | Pleosporales | Phaeosphaeriaceae         | <i>Paraphoma</i>    | <i>Paraphoma radicina</i> (T) (NR156556)         | 95             |
|                        | Y2HECF13  | JX238770          |                 | Capnodiales  | Davidiellaceae            | <i>Cladosporium</i> | <i>Cladosporium crousii</i> (T) (NR148192)       | 99             |
|                        | Y2HECF11  | JX238768          | Eurotiomycetes  | Eurotiales   | Trichocomaceae            | <i>Talaromyces</i>  | <i>Talaromyces australis</i> (T) (NR147431)      | 99             |
|                        | Y2HECF42  | JX238776          | Sordariomycetes | Hypocreales  | Nectriaceae               | <i>Penicillium</i>  | <i>Lecanicillium dimorphum</i> (T) (NR111101)    | 95             |
|                        | Y2HECF12  | JX238769          |                 |              |                           |                     | <i>Penicillium atramentosum</i> (T) (NR121250)   | 100            |
|                        | Y2HECF15  | JX238771          |                 |              |                           |                     | <i>Penicillium atramentosum</i> (T) (NR121250)   | 100            |
|                        | Y2HECF311 | JX238772          |                 |              |                           |                     | <i>Penicillium pullum</i> (T) (NR156498)         | 98             |
|                        | Y2HECF312 | JX238773          |                 |              |                           |                     | <i>Penicillium atramentosum</i> (T) (NR121250)   | 100            |
|                        | Y2HECF32  | JX238774          |                 |              |                           |                     | <i>Penicillium reticulisporum</i> (T) (NR121231) | 100            |
|                        | Y2HECF33  | JX238775          |                 |              |                           |                     | <i>Penicillium bialowiezense</i> (T) (NR165994)  | 99             |
|                        | Y2HECF51  | JX238779          |                 |              |                           |                     | <i>Penicillium maximae</i> (T) (NR121343)        | 100            |
|                        | Y2HECF81  | JX238780          |                 |              |                           |                     | <i>Penicillium bialowiezense</i> (T) (NR165994)  | 100            |
|                        | Y2HECF83  | JX238781          |                 |              |                           |                     | <i>Penicillium hetheringtonii</i> (T) (NR111482) | 95             |
|                        | Y2HECF93  | JX238782          |                 |              |                           |                     | <i>Penicillium atramentosum</i> (T) (NR121250)   | 99             |
|                        | Y2HECF102 | JX238783          |                 |              |                           |                     | <i>Penicillium fimorum</i> (T) (NR153267)        | 100            |

Table S1. Fungal isolates and their taxonomic identity from each coastal plant species

| Halophyte species | Strain     | GenBank accession | Class           | Order             | Family            | Genus                                            | Closest relative based on sequence homology        | Similarity (%) |
|-------------------|------------|-------------------|-----------------|-------------------|-------------------|--------------------------------------------------|----------------------------------------------------|----------------|
| Cnidium japonicum | Y2HECJ111  | JX238801          | Ascomycetes     | Mycosphaerellales | Dissoconiaceae    | <i>Rhexocercosporidium</i>                       | <i>Rhexocercosporidium panacis</i> (T) (NR119568)  | 99             |
|                   | Y2HECJ33   | JX238790          | Dothideomycetes | Pleosporales      | Phaeosphaeriaceae | <i>Paraphoma</i>                                 | <i>Paraphoma raphiolepidis</i> (T) (NR154373)      | 99             |
|                   | Y2HECJ104  | JX238800          |                 |                   |                   |                                                  | <i>Paraphoma raphiolepidis</i> (T) (NR154373)      | 99             |
|                   | Y2HECJ133  | JX238806          |                 |                   |                   |                                                  | <i>Paraphoma raphiolepidis</i> (T) (NR154373)      | 100            |
|                   | Y2HECJ134  | JX238807          |                 |                   |                   |                                                  | <i>Paraphoma raphiolepidis</i> (T) (NR154373)      | 99             |
|                   | Y2HECJ135  | JX238808          |                 |                   |                   |                                                  | <i>Paraphoma raphiolepidis</i> (T) (NR154373)      | 100            |
|                   | Y2HECJ36   | JX238791          |                 |                   |                   |                                                  | Dothideales                                        | Dothioraceae   |
|                   | Y2HECJ11   | JX238784          | Eurotiomycetes  | Eurotiales        | Trichocomaceae    | <i>Talaromyces</i>                               | <i>Talaromyces aurantiacus</i> (T) (NR103681)      | 99             |
|                   | Y2HECJ12   | JX238785          |                 |                   |                   |                                                  | <i>Talaromyces aurantiacus</i> (T) (NR103681)      | 100            |
|                   | Y2HECJ25   | JX238789          |                 |                   |                   |                                                  | <i>Talaromyces rubrifaciens</i> (T) (NR164482)     | 96             |
|                   | Y2HECJ102  | JX238799          |                 |                   |                   |                                                  | <i>Talaromyces gossypii</i> (T) (NR147423)         | 100            |
|                   | Y2HECJ22   | JX238787          |                 |                   |                   | <i>Aspergillus</i>                               | <i>Aspergillus brunneoviolaceus</i> (T) (NR138279) | 100            |
|                   | Y2HECJ72   | JX238797          |                 |                   |                   |                                                  | <i>Aspergillus tubingensis</i> (T) (NR131293)      | 100            |
|                   | Y2HECJ96   | JX238798          |                 |                   |                   |                                                  | <i>Aspergillus costaricensis</i> (T) (NR103604)    | 100            |
|                   | Y2HECJ13   | JX238786          |                 |                   |                   |                                                  | <i>Penicillium crustosum</i> (T) (NR077153)        | 100            |
|                   | Y2HECJ23   | JX238788          |                 |                   |                   | <i>Penicillium radiatolobatum</i> (T) (NR163679) | 100                                                |                |
|                   | Y2HECJ41   | JX238792          |                 |                   |                   | <i>Penicillium thomii</i> (T) (NR077159)         | 100                                                |                |
|                   | Y2HECJ45   | JX238793          |                 |                   |                   | <i>Penicillium chalahudae</i> (T) (NR144845)     | 100                                                |                |
|                   | Y2HECJ61   | JX238794          |                 |                   |                   | <i>Penicillium cataractarum</i> (T) (NR158822)   | 100                                                |                |
|                   | Y2HECJ62   | JX238795          | Sordariomycetes | Hypocreales       | Nectriaceae       | <i>Penicillium</i>                               | <i>Penicillium panissanguineum</i> (T) (NR158825)  | 100            |
|                   | Y2HECJ63   | JX238796          |                 |                   |                   |                                                  | <i>Penicillium murcianum</i> (T) (NR138358)        | 100            |
|                   | Y2HECJ122  | JX238802          |                 |                   |                   |                                                  | <i>Penicillium radiatolobatum</i> (T) (NR163679)   | 100            |
|                   | Y2HECJ1221 | JX238803          |                 |                   |                   |                                                  | <i>Penicillium corylophilum</i> (T) (NR121236)     | 100            |
|                   | Y2HECJ1222 | JX238804          |                 |                   |                   |                                                  | <i>Penicillium radiatolobatum</i> (T) (NR163679)   | 100            |
|                   | Y2HECJ132  | JX238805          |                 |                   |                   |                                                  | <i>Penicillium pedernalense</i> (T) (NR146250)     | 100            |

Table S1. Fungal isolates and their taxonomic identity from each coastal plant species

| Halophyte species | Strain    | GenBank accession | Class           | Order       | Family         | Genus              | Closest relative based on sequence homology    | Similarity (%) |
|-------------------|-----------|-------------------|-----------------|-------------|----------------|--------------------|------------------------------------------------|----------------|
| Carex kobomugi    | Y2HCK213  | JX238811          | Eurotiomycetes  | Eurotiales  | Trichocomaceae | <i>Talaromyces</i> | <i>Talaromyces pratensis</i> (T) (NR165529)    | 98             |
|                   | Y2HECK92  | JX238814          |                 |             |                | <i>Aspergillus</i> | <i>Aspergillus terreus</i> (T) (NR131276)      | 100            |
|                   | Y2HECK521 | JX238812          |                 |             |                | <i>Fusarium</i>    | <i>Fusarium foetens</i> (T) (NR159865)         | 100            |
|                   | Y2HECK17  | JX238809          | Sordariomycetes | Hypocreales | Nectriaceae    | <i>Penicillium</i> | <i>Penicillium bilaiae</i> (T) (NR111679)      | 100            |
|                   | Y2HECK212 | JX238810          |                 |             |                |                    | <i>Penicillium jugoslavicum</i> (T) (NR120269) | 100            |
|                   | Y2HECK64  | JX238813          |                 |             |                |                    | <i>Penicillium kurssanovii</i> (T) (NR138278)  | 100            |
|                   | Y2HECK106 | JX238815          |                 |             |                |                    | <i>Penicillium chlabudae</i> (T) (NR144845)    | 100            |

Table S1. Fungal isolates and their taxonomic identity from each coastal plant species

| Halophyte species | Strain     | GenBank accession | Class           | Order             | Family               | Genus                    | Closest relative based on sequence homology      | Similarity (%) |
|-------------------|------------|-------------------|-----------------|-------------------|----------------------|--------------------------|--------------------------------------------------|----------------|
| Carex pumila      | Y2HECP41   | JX238816          | Dothideomycetes | Pleosporales      | Phaeosphaeriaceae    | <i>Paraphoma</i>         | <i>Paraphoma radicina</i> (T) (NR156556)         | 95             |
|                   | Y2HECP71   | JX238818          |                 | Dothideales       | Dothioraceae         | <i>Aureobasidium</i>     | <i>Aureobasidium namibiae</i> (T) (NR147362)     | 97             |
|                   | Y2HECP121  | JX238826          |                 | Pleosporales      | Didymosphaeriaceae   | <i>Paraphaeosphaeria</i> | <i>Paraphaeosphaeria sardoa</i> (T) (NR145167)   | 98             |
|                   | Y2HECP589  | JX238817          |                 |                   | Pleosporaceae        | <i>Alternaria</i>        | <i>Alternaria destruens</i> (T) (NR137143)       | 100            |
|                   | Y2HECP81   | JX238820          | Eurotiomycetes  | Eurotiales        | Trichocomaceae       | <i>Talaromyces</i>       | <i>Talaromyces funiculosus</i> (T) (NR103678)    | 100            |
|                   | Y2HECP102  | JX238823          |                 |                   |                      |                          | <i>Talaromyces funiculosus</i> (T) (NR103678)    | 100            |
|                   | Y2HECP72   | JX238819          | Saccharomycetes | Saccharomycetales | Saccharomycetaceae   | <i>Meyerozyma</i>        | <i>Meyerozyma guilliermondii</i> (T) (NR111247)  | 98             |
|                   | Y2HECP111  | JX238824          |                 | Hypocreales       | Nectriaceae          | <i>Penicillium</i>       | <i>Penicillium thomii</i> (T) (NR077159)         | 99             |
|                   | Y2HECP1014 | JX238822          |                 |                   |                      |                          | <i>Penicillium radiatolobatum</i> (T) (NR163679) | 100            |
|                   | Y2HECP112  | JX238825          |                 |                   |                      |                          | <i>Penicillium brasilianum</i> (T) (NR111499)    | 99             |
|                   | Y2HECP814  | JX238821          |                 |                   | Ophiocordycipitaceae | <i>Purpureocillium</i>   | <i>Purpureocillium lilacinum</i> (T) (NR165946)  | 98             |



Table S1. Fungal isolates and their taxonomic identity from each coastal plant species

| Halophyte species | Strain    | GenBank accession | Class           | Order             | Family         | Genus                 | Closest relative based on sequence homology     | Similarity (%) |
|-------------------|-----------|-------------------|-----------------|-------------------|----------------|-----------------------|-------------------------------------------------|----------------|
| Elymus mollis     | Y2HEEM131 | JX238834          | Ascomycetes     | Mycosphaerellales | Dissoconiaceae | <i>Ramichloridium</i> | <i>Ramichloridium luteum</i> (T) (NR119684)     | 95             |
|                   | Y2HEEM52  | JX238828          | Dothideomycetes | Dothideales       | Dothioraceae   | <i>Aureobasidium</i>  | <i>Aureobasidium melanogenum</i> (T) (NR159598) | 100            |
|                   | Y2HEEM62  | JX238830          | Eurotiomycetes  | Eurotiales        | Trichocomaceae | <i>Aspergillus</i>    | <i>Aspergillus costaricensis</i> (T) (NR103604) | 100            |
|                   | Y2HEEM911 | JX238832          |                 |                   |                |                       | <i>Aspergillus tubingensis</i> (T) (NR131293)   | 100            |
|                   | Y2HEEM51  | JX238827          | Sordariomycetes | Hypocreales       | Nectriaceae    | <i>Fusarium</i>       | <i>Fusarium fujikuroi</i> (T) (NR111889)        | 100            |
|                   | Y2HEEM541 | JX238829          |                 |                   |                |                       | <i>Fusarium foetens</i> (T) (NR159865)          | 99             |
|                   | Y2HEEM82  | JX238831          |                 |                   |                | <i>Penicillium</i>    | <i>Penicillium glabrum</i> (T) (NR163530)       | 100            |
|                   | Y2HEEM121 | JX238833          |                 |                   |                |                       | <i>Penicillium thomii</i> (T) (NR077159)        | 100            |

Table S1. Fungal isolates and their taxonomic identity from each coastal plant species

| Halophyte species         | Strain    | GenBank accession | Class                                          | Order                                           | Family                                 | Genus                                           | Closest relative based on sequence homology    | Similarity (%) |
|---------------------------|-----------|-------------------|------------------------------------------------|-------------------------------------------------|----------------------------------------|-------------------------------------------------|------------------------------------------------|----------------|
| Ischaemum antheophoroides | Y2HEIA44  | JX238848          | Dothideomycetes                                | Pleosporales                                    | Phaeosphaeriaceae                      | <i>Paraphoma</i>                                | <i>Paraphoma raphiolepidis</i> (T) (NR154373)  | 98             |
|                           | Y2HEIA23  | JX238837          |                                                |                                                 | Pleosporaceae                          | <i>Alternaria</i>                               | <i>Alternaria alstroemeriae</i> (T) (NR163686) | 99             |
|                           | Y2HEIA35  | JX238844          |                                                |                                                 | <i>Talaromyces</i>                     | <i>Sagenomella</i>                              | <i>Sagenomella diversispora</i> (T) (NR164428) | 95             |
|                           | Y2HEIA25  | JX238839          |                                                |                                                 |                                        | <i>Talaromyces rubrifaciens</i> (T) (NR164482)  | 98                                             |                |
|                           | Y2HEIA32  | JX238841          |                                                |                                                 |                                        | <i>Talaromyces minioluteus</i> (T) (NR121527)   | 100                                            |                |
|                           | Y2HEIA33  | JX238842          |                                                |                                                 |                                        | <i>Talaromyces thailandensis</i> (T) (NR147428) | 100                                            |                |
|                           | Y2HEIA48  | JX238849          |                                                |                                                 |                                        | <i>Talaromyces funiculosus</i> (T) (NR103678)   | 100                                            |                |
|                           | Y2HEIA55  | JX238853          | <i>Talaromyces australis</i> (T) (NR147431)    | 100                                             |                                        |                                                 |                                                |                |
|                           | Y2HEIA74  | JX238858          | <i>Talaromyces australis</i> (T) (NR147431)    | 100                                             |                                        |                                                 |                                                |                |
|                           | Y2HEIA82  | JX238860          | <i>Talaromyces calidicanius</i> (T) (NR103665) | 100                                             |                                        |                                                 |                                                |                |
|                           | Y2HEIA94  | JX238863          | <i>Talaromyces australis</i> (T) (NR147431)    | 100                                             |                                        |                                                 |                                                |                |
|                           | Y2HEIA11  | JX238835          | <i>Aspergillus</i>                             | <i>Aspergillus aureolus</i> (T) (NR135405)      |                                        | 100                                             |                                                |                |
|                           | Y2HEIA31  | JX238840          |                                                | <i>Aspergillus aureolus</i> (T) (NR135405)      | 100                                    |                                                 |                                                |                |
|                           | Y2HEIA41  | JX238845          |                                                | <i>Aspergillus aureolus</i> (T) (NR135405)      | 100                                    |                                                 |                                                |                |
|                           | Y2HEIA53  | JX238851          |                                                | <i>Aspergillus wyomingensis</i> (T) (NR137517)  | 99                                     |                                                 |                                                |                |
|                           | Y2HEIA54  | JX238852          |                                                | <i>Aspergillus costaricensis</i> (T) (NR103604) | 100                                    |                                                 |                                                |                |
|                           | Y2HEIA56  | JX238854          |                                                | Cordycipitaceae                                 | <i>Lecanicillium</i>                   | <i>Lecanicillium dimorphum</i> (T) (NR111101)   | 95                                             |                |
|                           | Y2HEIA411 | JX238846          |                                                | <i>Fusarium</i>                                 | <i>Fusarium foetens</i> (T) (NR159865) | 99                                              |                                                |                |
|                           | Y2HEIA72  | JX238857          | <i>Penicillium</i>                             | <i>Penicillium chalabudae</i> (T) (NR144845)    | 100                                    |                                                 |                                                |                |
|                           | Y2HEIA21  | JX238836          |                                                | <i>Penicillium halotolerans</i> (T) (NR111812)  | 100                                    |                                                 |                                                |                |
|                           | Y2HEIA24  | JX238838          |                                                | <i>Penicillium abidjanum</i> (T) (NR111502)     | 97                                     |                                                 |                                                |                |
|                           | Y2HEIA34  | JX238843          |                                                | <i>Penicillium halotolerans</i> (T) (NR111812)  | 99                                     |                                                 |                                                |                |
|                           | Y2HEIA42  | JX238847          |                                                | <i>Penicillium halotolerans</i> (T) (NR111812)  | 100                                    |                                                 |                                                |                |
|                           | Y2HEIA52  | JX238850          |                                                | Sordariomycetes                                 | Hypocreales                            | Nectriaceae                                     | <i>Penicillium flavigenum</i> (T) (NR103695)   | 100            |
|                           | Y2HEIA62  | JX238855          |                                                |                                                 |                                        |                                                 | <i>Penicillium kurssanovii</i> (T) (NR138278)  | 100            |
|                           | Y2HEIA71  | JX238856          |                                                |                                                 |                                        |                                                 | <i>Penicillium cinereoatrum</i> (T) (NR144837) | 99             |
|                           | Y2HEIA81  | JX238859          |                                                |                                                 |                                        |                                                 | <i>Penicillium chalabudae</i> (T) (NR144845)   | 99             |
|                           | Y2HEIA83  | JX238861          |                                                |                                                 |                                        |                                                 | <i>Penicillium chalabudae</i> (T) (NR144845)   | 99             |
|                           | Y2HEIA84  | JX238862          |                                                |                                                 |                                        |                                                 | <i>Penicillium chalabudae</i> (T) (NR144845)   | 99             |
|                           | Y2HEIA95  | JX238864          |                                                |                                                 |                                        |                                                 | <i>Penicillium chalabudae</i> (T) (NR144845)   | 100            |
|                           | Y2HEIA96  | JX238865          |                                                |                                                 |                                        |                                                 | <i>Penicillium chalabudae</i> (T) (NR144845)   | 100            |

Table S1. Fungal isolates and their taxonomic identity from each coastal plant species

| Halophyte species | Strain    | GenBank accession | Class           | Order        | Family                    | Genus                      | Closest relative based on sequence homology       | Similarity (%) |
|-------------------|-----------|-------------------|-----------------|--------------|---------------------------|----------------------------|---------------------------------------------------|----------------|
| Linaria japonica  | Y2HELJ82  | JX238870          | Dothideomycetes | Pleosporales | Pleosporaceae             | <i>Alternaria</i>          | <i>Alternaria destruens</i> (T) (NR137143)        | 100            |
|                   | Y2HELJ83  | JX238871          |                 |              |                           | <i>Talaromyces</i>         | <i>Talaromyces rubrifaciens</i> (T) (NR164482)    | 98             |
|                   | Y2HELJ86  | JX238872          |                 |              |                           |                            | <i>Talaromyces rubrifaciens</i> (T) (NR164482)    | 97             |
|                   | Y2HELJ92  | JX238873          | Eurotiomycetes  | Eurotiales   | Trichocomaceae            | <i>Aspergillus</i>         | <i>Aspergillus terreus</i> (T) (NR131276)         | 100            |
|                   | Y2HELJ112 | JX238874          |                 |              |                           |                            | <i>Aspergillus aureolus</i> (T) (NR135405)        | 100            |
|                   | Y2HELJ132 | JX238875          |                 |              |                           |                            | <i>Aspergillus lentulus</i> (T) (NR135407)        | 100            |
|                   | Y2HELJ31  | JX238867          | Leotiomycetes   | Helotiales   | Helotiales incertae sedis | <i>Rhexocercosporidium</i> | <i>Rhexocercosporidium panacis</i> (T) (NR119568) | 99             |
|                   | Y2HELJ22  | JX238866          |                 |              |                           |                            | <i>Penicillium adametzii</i> (T) (NR103661)       | 100            |
|                   | Y2HELJ42  | JX238868          | Sordariomycetes | Hypocreales  | Nectriaceae               | <i>Penicillium</i>         | <i>Penicillium brasilianum</i> (T) (NR111499)     | 97             |
|                   | Y2HELJ75  | JX238869          |                 |              |                           |                            | <i>Penicillium radiatolobatum</i> (T) (NR163679)  | 100            |

Table S1. Fungal isolates and their taxonomic identity from each coastal plant species

| Halophyte species  | Strain     | GenBank accession | Class           | Order       | Family         | Genus              | Closest relative based on sequence homology    | Similarity (%) |
|--------------------|------------|-------------------|-----------------|-------------|----------------|--------------------|------------------------------------------------|----------------|
| Lathyrus japonicus | Y2HELJW104 | JX238878          | Eurotiomycetes  | Eurotiales  | Trichocomaceae | <i>Talaromyces</i> | <i>Talaromyces gossypii</i> (T) (NR147423)     | 100            |
|                    | Y2HELJW11  | JX238876          | Sordariomycetes | Hypocreales | Nectriaceae    | <i>Penicillium</i> | <i>Penicillium citreonigrum</i> (T) (NR138264) | 100            |
|                    | Y2HELJW52  | JX238877          |                 |             |                |                    | <i>Penicillium thomii</i> (T) (NR077159)       | 100            |
|                    | Y2HELJW111 | JX238879          |                 |             |                |                    | <i>Penicillium citrinum</i> (T) (NR121224)     | 100            |
|                    | Y2HELJW113 | JX238880          |                 |             |                |                    | <i>Penicillium thomii</i> (T) (NR077159)       | 100            |

Table S1. Fungal isolates and their taxonomic identity from each coastal plant species

| Halophyte species     | Strain    | GenBank accession | Class           | Order       | Family         | Genus              | Closest relative based on sequence homology   | Similarity (%) |
|-----------------------|-----------|-------------------|-----------------|-------------|----------------|--------------------|-----------------------------------------------|----------------|
| Lysimachia mauritiana | Y2HELM11  | JX238881          | Eurotiomycetes  | Eurotiales  | Trichocomaceae | <i>Talaromyces</i> | <i>Talaromyces australis</i> (T) (NR147431)   | 100            |
|                       | Y2HELM112 | JX238882          |                 |             |                | <i>Aspergillus</i> | <i>Aspergillus tubingensis</i> (T) (NR131293) | 100            |
|                       | Y2HELM121 | JX238883          | Sordariomycetes | Hypocreales | Nectriaceae    | <i>Penicillium</i> | <i>Penicillium citrinum</i> (T) (NR121224)    | 100            |

Table S1. Fungal isolates and their taxonomic identity from each coastal plant species

| Halophyte species    | Strain    | GenBank accession | Class           | Order             | Family         | Genus                 | Closest relative based on sequence homology        | Similarity (%) |
|----------------------|-----------|-------------------|-----------------|-------------------|----------------|-----------------------|----------------------------------------------------|----------------|
| Phragmites australis | Y2HEPA91  | JX238886          | Ascomycetes     | Mycosphaerellales | Dissoconiaceae | <i>Ramichloridium</i> | <i>Ramichloridium luteum</i> (T) (NR119684)        | 95             |
|                      | Y2HEPA21  | JX238884          | Dothideomycetes | Pleosporales      | Pleosporaceae  | <i>Exserohilum</i>    | <i>Exserohilum mcginnisii</i> (T) (NR157456)       | 100            |
|                      | Y2HEPA131 | JX238888          |                 |                   | Didymellaceae  | <i>Epicoccum</i>      | <i>Epicoccum thailandicum</i> (T) (NR152926)       | 100            |
|                      | Y2HEPA113 | JX238887          | Eurotiomycetes  | Capnodiales       | Davidiellaceae | <i>Cladosporium</i>   | <i>Cladosporium pini-ponderosae</i> (T) (NR119730) | 100            |
|                      | Y2HEPA132 | JX238889          |                 | Eurotiales        | Trichocomaceae | <i>Talaromyces</i>    | <i>Talaromyces calidicanus</i> (T) (NR103665)      | 100            |
|                      | Y2HEPA711 | JX238885          |                 | Hypocreales       | Nectriaceae    | <i>Penicillium</i>    | <i>Penicillium amaliae</i> (T) (NR111767)          | 100            |

Table S1. Fungal isolates and their taxonomic identity from each coastal plant species

| Halophyte species     | Strain    | GenBank accession | Class           | Order             | Family                    | Genus                      | Closest relative based on sequence homology         | Similarity (%) |
|-----------------------|-----------|-------------------|-----------------|-------------------|---------------------------|----------------------------|-----------------------------------------------------|----------------|
| Plantago camtschatica | Y2HEPC124 | JX238906          | Dothideomycetes | Pleosporales      | Pseudopyrenochaetaceae    | <i>Pseudopyrenochaeta</i>  | <i>Pseudopyrenochaeta terrestris</i> (T) (NR160575) | 94             |
|                       | Y2HEPC135 | JX238907          |                 |                   | Pleosporaceae             | <i>Alternaria</i>          | <i>Alternaria destruens</i> (T) (NR137143)          | 100            |
|                       | Y2HEPC121 | JX238905          |                 | Incertae sedis    | Pseudeurotiaceae          | <i>Pseudogymnoascus</i>    | <i>Pseudogymnoascus destructans</i> (T) (NR111838)  | 98             |
|                       | Y2HEPC41  | JX238893          | Eurotiomycetes  | Eurotiales        | Trichocomaceae            | <i>Talaromyces</i>         | <i>Talaromyces tumuli</i> (T) (NR165528)            | 97             |
|                       | Y2HEPC83  | JX238900          |                 |                   |                           |                            | <i>Talaromyces coalescens</i> (T) (NR120008)        | 100            |
|                       | Y2HEPC54  | JX238896          |                 |                   |                           | <i>Aspergillus</i>         | <i>Aspergillus costaricensis</i> (T) (NR103604)     | 100            |
|                       | Y2HEPC63  | JX238898          | Leotiomycetes   | Helotiales        | Helotiaceae               | <i>Mycofalcella</i>        | <i>Mycofalcella calcarata</i> (T) (NR154165)        | 99             |
|                       | Y2HEPC62  | JX238897          |                 |                   | Helotiales incertae sedis | <i>Rhexocercosporidium</i> | <i>Rhexocercosporidium panacis</i> (T) (NR119568)   | 99             |
|                       | Y2HEPC85  | JX238901          |                 |                   |                           |                            | <i>Rhexocercosporidium panacis</i> (T) (NR119568)   | 98             |
|                       | Y2HEPC97  | JX238904          | Saccharomycetes | Saccharomycetales | Saccharomycetaceae        | <i>Meyerozyma</i>          | <i>Meyerozyma guilliermondii</i> (T) (NR111247)     | 97             |
|                       | Y2HEPC137 | JX238908          |                 |                   |                           | <i>Neocosmospora</i>       | <i>Neocosmospora rubicola</i> (T) (NR154227)        | 100            |
|                       | Y2HEPC13  | JX238890          |                 |                   |                           |                            | <i>Penicillium rudallense</i> (T) (NR137898)        | 100            |
|                       | Y2HEPC31  | JX238891          |                 | Hypocreales       | Nectriaceae               | <i>Penicillium</i>         | <i>Penicillium meridianum</i> (T) (NR121237)        | 100            |
|                       | Y2HEPC331 | JX238892          |                 |                   |                           |                            | <i>Penicillium pedernalense</i> (T) (NR146250)      | 100            |
|                       | Y2HEPC411 | JX238894          |                 |                   |                           |                            | <i>Penicillium thomii</i> (T) (NR077159)            | 100            |
|                       | Y2HEPC521 | JX238895          |                 |                   |                           |                            | <i>Penicillium rudallense</i> (T) (NR137898)        | 100            |
|                       | Y2HEPC81  | JX238899          |                 |                   |                           |                            | <i>Penicillium lapidosum</i> (T) (NR121223)         | 100            |
|                       | Y2HEPC87  | JX238902          |                 |                   |                           |                            | <i>Penicillium chalabudae</i> (T) (NR144845)        | 99             |
|                       | Y2HEPC96  | JX238903          |                 |                   |                           |                            | <i>Penicillium chalabudae</i> (T) (NR144845)        | 100            |

Table S1. Fungal isolates and their taxonomic identity from each coastal plant species

| Halophyte species | Strain    | GenBank accession | Class                                         | Order        | Family             | Genus                                      | Closest relative based on sequence homology     | Similarity (%) |                      |                                             |                                              |
|-------------------|-----------|-------------------|-----------------------------------------------|--------------|--------------------|--------------------------------------------|-------------------------------------------------|----------------|----------------------|---------------------------------------------|----------------------------------------------|
| Pinus thunbergii  | Y2HEPT85  | JX238937          | Dothideomycetes                               | Pleosporales | Phaeosphaeriaceae  | <i>Paraphoma</i>                           | <i>Paraphoma radicina</i> (T) (NR156556)        | 97             |                      |                                             |                                              |
|                   | Y2HEPT41  | JX238918          |                                               |              | Aspergillaceae     | <i>Phialomyces</i>                         | <i>Phialomyces macrosporus</i> (T) (NR160098)   | 95             |                      |                                             |                                              |
|                   | Y2HEPT11  | JX238909          |                                               |              | Trichocomaceae     | <i>Talaromyces</i>                         | <i>Talaromyces veerkampii</i> (T) (NR153228)    | 100            |                      |                                             |                                              |
|                   | Y2HEPT12  | JX238910          |                                               |              |                    |                                            | <i>Talaromyces pratensis</i> (T) (NR165529)     | 97             |                      |                                             |                                              |
|                   | Y2HEPT13  | JX238911          |                                               |              |                    |                                            | <i>Talaromyces fuscoviridis</i> (T) (NR153227)  | 100            |                      |                                             |                                              |
|                   | Y2HEPT35  | JX238915          |                                               |              |                    |                                            | <i>Talaromyces rubrifaciens</i> (T) (NR164482)  | 97             |                      |                                             |                                              |
|                   | Y2HEPT43  | JX238919          |                                               |              |                    |                                            | <i>Talaromyces pratensis</i> (T) (NR165529)     | 97             |                      |                                             |                                              |
|                   | Y2HEPT44  | JX238920          |                                               |              |                    |                                            | <i>Talaromyces udagawae</i> (T) (NR145156)      | 99             |                      |                                             |                                              |
|                   | Y2HEPT45  | JX238921          |                                               |              |                    |                                            | <i>Talaromyces australis</i> (T) (NR147431)     | 100            |                      |                                             |                                              |
|                   | Y2HEPT53  | JX238924          |                                               |              |                    |                                            | <i>Talaromyces rubrifaciens</i> (T) (NR164482)  | 98             |                      |                                             |                                              |
|                   | Y2HEPT61  | JX238926          |                                               |              |                    |                                            | <i>Talaromyces australis</i> (T) (NR147431)     | 100            |                      |                                             |                                              |
|                   | Y2HEPT64  | JX238927          |                                               |              |                    |                                            | <i>Talaromyces rubrifaciens</i> (T) (NR164482)  | 95             |                      |                                             |                                              |
|                   | Y2HEPT73  | JX238930          |                                               |              |                    |                                            | <i>Talaromyces rubrifaciens</i> (T) (NR164482)  | 95             |                      |                                             |                                              |
|                   | Y2HEPT75  | JX238932          | Eurotiomycetes                                | Eurotiales   | <i>Aspergillus</i> |                                            | <i>Talaromyces tumuli</i> (T) (NR165528)        | 98             |                      |                                             |                                              |
|                   | Y2HEPT84  | JX238936          |                                               |              |                    |                                            | <i>Talaromyces australis</i> (T) (NR147431)     | 99             |                      |                                             |                                              |
|                   | Y2HEPT93  | JX238939          |                                               |              |                    |                                            | <i>Talaromyces australis</i> (T) (NR147431)     | 99             |                      |                                             |                                              |
|                   | Y2HEPT96  | JX238941          |                                               |              |                    |                                            | <i>Talaromyces rubrifaciens</i> (T) (NR164482)  | 98             |                      |                                             |                                              |
|                   | Y2HEPT97  | JX238942          |                                               |              |                    |                                            | <i>Talaromyces rubrifaciens</i> (T) (NR164482)  | 96             |                      |                                             |                                              |
|                   | Y2HEPT104 | JX238944          |                                               |              |                    |                                            | <i>Talaromyces erythromellis</i> (T) (NR121531) | 97             |                      |                                             |                                              |
|                   | Y2HEPT52  | JX238923          |                                               |              |                    | <i>Aspergillus terreus</i> (T) (NR131276)  | 100                                             |                |                      |                                             |                                              |
|                   | Y2HEPT72  | JX238929          |                                               |              |                    | <i>Aspergillus terreus</i> (T) (NR131276)  | 99                                              |                |                      |                                             |                                              |
|                   | Y2HEPT74  | JX238931          |                                               |              |                    | <i>Aspergillus terreus</i> (T) (NR131276)  | 99                                              |                |                      |                                             |                                              |
|                   | Y2HEPT81  | JX238933          |                                               |              |                    | <i>Aspergillus terreus</i> (T) (NR131276)  | 100                                             |                |                      |                                             |                                              |
|                   | Y2HEPT83  | JX238935          |                                               |              |                    | <i>Aspergillus terreus</i> (T) (NR131276)  | 100                                             |                |                      |                                             |                                              |
|                   | Y2HEPT94  | JX238940          |                                               |              |                    | <i>Aspergillus aureolus</i> (T) (NR135405) | 100                                             |                |                      |                                             |                                              |
|                   | Y2HEPT102 | JX238943          |                                               |              |                    | Sordariomycetes                            | Hypocreales                                     | Nectriaceae    | <i>Acremoniopsis</i> | <i>Acremoniopsis suttoni</i> (T) (NR145059) | 99                                           |
|                   | Y2HEPT51  | JX238922          |                                               |              |                    |                                            | Sordariales                                     | Chaetomiaceae  | <i>Arcopilus</i>     | <i>Arcopilus globulus</i> (T) (NR165922)    | 100                                          |
|                   | Y2HEPT55  | JX238925          |                                               |              |                    |                                            |                                                 |                |                      | <i>Arcopilus globulus</i> (T) (NR165922)    | 100                                          |
|                   | Y2HEPT71  | JX238928          |                                               |              |                    |                                            | Hypocreales                                     | Nectriaceae    | <i>Penicillium</i>   | <i>Fusarium</i>                             | <i>Fusarium bactridioides</i> (T) (NR120262) |
|                   | Y2HEPT31  | JX238912          | <i>Penicillium ludwigii</i> (T) (NR138339)    | 100          |                    |                                            |                                                 |                |                      |                                             |                                              |
|                   | Y2HEPT32  | JX238913          | <i>Penicillium abidjanum</i> (T) (NR111502)   | 98           |                    |                                            |                                                 |                |                      |                                             |                                              |
|                   | Y2HEPT34  | JX238914          | <i>Penicillium kurssanovii</i> (T) (NR138278) | 100          |                    |                                            |                                                 |                |                      |                                             |                                              |
|                   | Y2HEPT37  | JX238916          | <i>Penicillium abidjanum</i> (T) (NR111502)   | 97           |                    |                                            |                                                 |                |                      |                                             |                                              |
|                   | Y2HEPT38  | JX238917          | <i>Penicillium ludwigii</i> (T) (NR138339)    | 100          |                    |                                            |                                                 |                |                      |                                             |                                              |
|                   | Y2HEPT82  | JX238934          | <i>Penicillium chalahudae</i> (T) (NR144845)  | 98           |                    |                                            |                                                 |                |                      |                                             |                                              |
|                   | Y2HEPT91  | JX238938          | <i>Penicillium chalahudae</i> (T) (NR144845)  | 100          |                    |                                            |                                                 |                |                      |                                             |                                              |



Table S1. Fungal isolates and their taxonomic identity from each coastal plant species

| Halophyte species | Strain    | GenBank accession | Class           | Order           | Family           | Genus              | Closest relative based on sequence homology     | Similarity (%) |
|-------------------|-----------|-------------------|-----------------|-----------------|------------------|--------------------|-------------------------------------------------|----------------|
| Rosa rugosa       | Y2HERR31  | JX238948          | Agaricomycetes  | Russulales      | Peniophoraceae   | <i>Peniophora</i>  | <i>Peniophora crassitunicata</i> (T) (NR164287) | 99             |
|                   | Y2HERR11  | JX238945          | Eurotiomycetes  | Eurotiales      | Trichocomaceae   | <i>Talaromyces</i> | <i>Talaromyces tumuli</i> (T) (NR165528)        | 100            |
|                   | Y2HERR33  | JX238949          |                 |                 |                  |                    | <i>Talaromyces australis</i> (T) (NR147431)     | 99             |
|                   | Y2HERR34  | JX238950          |                 |                 |                  |                    | <i>Talaromyces australis</i> (T) (NR147431)     | 99             |
|                   | Y2HERR73  | JX238956          |                 |                 |                  |                    | <i>Talaromyces australis</i> (T) (NR147431)     | 99             |
|                   | Y2HERR102 | JX238961          |                 |                 |                  |                    | <i>Talaromyces australis</i> (T) (NR147431)     | 97             |
|                   | Y2HERR42  | JX238952          | Sordariomycetes | Ophiostomatales | Ophiostomataceae | <i>Sporothrix</i>  | <i>Sporothrix rossii</i> (T) (NR147597)         | 95             |
|                   | Y2HERR103 | JX238962          |                 | Hypocreales     | Hypocreaceae     | <i>Trichoderma</i> | <i>Trichoderma gamsii</i> (T) (NR131317)        | 99             |
|                   | Y2HERR12  | JX238946          |                 |                 | Nectriaceae      | <i>Penicillium</i> | <i>Penicillium abidjanum</i> (T) (NR111502)     | 97             |
|                   | Y2HERR14  | JX238947          |                 |                 |                  |                    | <i>Penicillium abidjanum</i> (T) (NR111502)     | 97             |
|                   | Y2HERR41  | JX238951          |                 |                 |                  |                    | <i>Penicillium chalahudae</i> (T) (NR144845)    | 99             |
|                   | Y2HERR52  | JX238953          |                 |                 |                  |                    | <i>Penicillium chalahudae</i> (T) (NR144845)    | 99             |
|                   | Y2HERR62  | JX238954          |                 |                 |                  |                    | <i>Penicillium chalahudae</i> (T) (NR144845)    | 100            |
|                   | Y2HERR72  | JX238955          |                 |                 |                  |                    | <i>Penicillium chalahudae</i> (T) (NR144845)    | 100            |
|                   | Y2HERR81  | JX238957          |                 |                 |                  |                    | <i>Penicillium chalahudae</i> (T) (NR144845)    | 99             |
|                   | Y2HERR83  | JX238958          |                 |                 |                  |                    | <i>Penicillium chalahudae</i> (T) (NR144845)    | 100            |
|                   | Y2HERR91  | JX238959          |                 |                 |                  |                    | <i>Penicillium chalahudae</i> (T) (NR144845)    | 100            |
|                   | Y2HERR101 | JX238960          |                 |                 |                  |                    | <i>Penicillium chalahudae</i> (T) (NR144845)    | 100            |

Table S1. Fungal isolates and their taxonomic identity from each coastal plant species

| Halophyte species   | Strain    | GenBank accession | Class           | Order             | Family                 | Genus                     | Closest relative based on sequence homology         | Similarity (%) |
|---------------------|-----------|-------------------|-----------------|-------------------|------------------------|---------------------------|-----------------------------------------------------|----------------|
| Sedum kamtschaticum | Y2HESK93  | JX238973          | Ascomycetes     | Incertae sedis    | Incertae sedis         | <i>Cadophora</i>          | <i>Cadophora luteo-olivacea</i> (T) (NR165945)      | 99             |
|                     | Y2HESK51  | JX238968          | Dothideomycetes | Pleosporales      | Pseudopyrenochaetaceae | <i>Pseudopyrenochaeta</i> | <i>Pseudopyrenochaeta terrestris</i> (T) (NR160575) | 99             |
|                     | Y2HESK52  | JX238969          |                 | Incertae sedis    | Pseudeurotiaceae       | <i>Pseudogymnoascus</i>   | <i>Pseudogymnoascus destructans</i> (T) (NR111838)  | 96             |
|                     | Y2HESK32  | JX238966          | Saccharomycetes | Saccharomycetales | Saccharomycetaceae     | <i>Meyerozyma</i>         | <i>Meyerozyma guilliermondii</i> (T) (NR111247)     | 99             |
|                     | Y2HESK711 | JX238970          |                 | Hypocreales       | Nectriaceae            | <i>Neocosmospora</i>      | <i>Neocosmospora rubicola</i> (T) (NR154227)        | 100            |
|                     | Y2HESK21  | JX238964          | Sordariomycetes | Hypocreales       | Nectriaceae            | <i>Penicillium</i>        | <i>Penicillium pedernalense</i> (T) (NR146250)      | 100            |
|                     | Y2HESK11  | JX238963          |                 |                   |                        |                           | <i>Penicillium thomii</i> (T) (NR077159)            | 100            |
|                     | Y2HESK22  | JX238965          |                 |                   |                        |                           | <i>Penicillium chalahudae</i> (T) (NR144845)        | 100            |
|                     | Y2HESK411 | JX238967          |                 |                   |                        |                           | <i>Penicillium chalahudae</i> (T) (NR144845)        | 100            |
|                     | Y2HESK81  | JX238971          |                 |                   |                        |                           | <i>Penicillium thomii</i> (T) (NR077159)            | 100            |
|                     | Y2HESK91  | JX238972          |                 |                   |                        |                           | <i>Penicillium pedernalense</i> (T) (NR146250)      | 100            |
|                     | Y2HESK102 | JX238974          |                 |                   |                        |                           | <i>Penicillium chalahudae</i> (T) (NR144845)        | 99             |
|                     | Y2HESK103 | JX238975          |                 |                   |                        |                           | <i>Penicillium thomii</i> (T) (NR077159)            | 100            |
|                     | Y2HESK105 | JX238976          |                 |                   |                        |                           | <i>Penicillium radiatolobatum</i> (T) (NR163679)    | 100            |
|                     | Y2HESK132 | JX238977          |                 |                   |                        |                           | <i>Penicillium rudallense</i> (T) (NR137898)        | 100            |

Table S1. Fungal isolates and their taxonomic identity from each coastal plant species

| Halophyte species  | Strain    | GenBank accession | Class           | Order        | Family          | Genus               | Closest relative based on sequence homology          | Similarity (%) |
|--------------------|-----------|-------------------|-----------------|--------------|-----------------|---------------------|------------------------------------------------------|----------------|
| Spergularia marina | Y2HESM51  | JX238982          | Dothideomycetes | Capnodiales  | Davidiellaceae  | <i>Cladosporium</i> | <i>Cladosporium pini-ponderosae</i> (T) (NR119730)   | 99             |
|                    | Y2HESM21  | JX238980          | Eurotiomycetes  | Eurotiales   | Trichocomaceae  | <i>Talaromyces</i>  | <i>Talaromyces australis</i> (T) (NR147431)          | 99             |
|                    | Y2HESM33  | JX238981          |                 |              |                 |                     | <i>Talaromyces veerkampii</i> (T) (NR153228)         | 100            |
|                    | Y2HESM62  | JX238983          |                 |              |                 | <i>Aspergillus</i>  | <i>Aspergillus oerlinghausenensis</i> (T) (NR138362) | 100            |
|                    | Y2HESM612 | JX238984          |                 |              |                 |                     | <i>Aspergillus oerlinghausenensis</i> (T) (NR138362) | 99             |
|                    | Y2HESM81  | JX238986          |                 |              |                 |                     | <i>Aspergillus uvarum</i> (T) (NR135330)             | 100            |
|                    | Y2HESM91  | JX238987          |                 |              |                 |                     | <i>Aspergillus brunneoviolaceus</i> (T) (NR138279)   | 100            |
|                    | Y2HESM72  | JX238985          | Leotiomycetes   | Helotiales   | Myxotrichaceae  | <i>Oidiodendron</i> | <i>Oidiodendron fuscum</i> (T) (NR111035)            | 100            |
|                    | Y2HESM11  | JX238978          | Sordariomycetes | Diaporthales | Melanconidaceae | <i>Melanconium</i>  | <i>Melanconium hedericola</i> (T) (NR137940)         | 100            |
|                    | Y2HESM12  | JX238979          |                 | Helotiales   | Dermateaceae    | <i>Pezicula</i>     | <i>Pezicula ericae</i> (T) (NR155653)                | 99             |

Table S1. Fungal isolates and their taxonomic identity from each coastal plant species

| Halophyte species    | Strain    | GenBank accession | Class           | Order        | Family         | Genus              | Closest relative based on sequence homology        | Similarity (%) |
|----------------------|-----------|-------------------|-----------------|--------------|----------------|--------------------|----------------------------------------------------|----------------|
| Sedum<br>oryzifolium | Y2HESO75  | JX238993          | Dothideomycetes | Pleosporales | Pleosporaceae  | <i>Alternaria</i>  | <i>Alternaria eichhorniae</i> (T) (NR111832)       | 100            |
|                      | Y2HESO96  | JX238997          |                 |              |                |                    | <i>Alternaria alstroemeriae</i> (T) (NR163686)     | 100            |
|                      | Y2HESO31  | JX238990          |                 |              | Didymellaceae  | <i>Epicoccum</i>   | <i>Epicoccum phragmospora</i> (T) (NR165920 )      | 100            |
|                      | Y2HESO213 | JX238989          | Eurotiomycetes  | Eurotiales   | Trichocomaceae | <i>Talaromyces</i> | <i>Talaromyces gossypii</i> (T) (NR147423)         | 100            |
|                      | Y2HESO39  | JX238991          |                 |              |                | <i>Aspergillus</i> | <i>Aspergillus brunneoviolaceus</i> (T) (NR138279) | 99             |
|                      | Y2HESO813 | JX238994          |                 |              |                |                    | <i>Aspergillus brunneoviolaceus</i> (T) (NR138279) | 100            |
|                      | Y2HESO92  | JX238996          |                 |              |                | <i>Fusarium</i>    | <i>Fusarium foetens</i> (T) (NR159865)             | 100            |
|                      | Y2HESO14  | JX238988          |                 |              |                | <i>Penicillium</i> | <i>Penicillium sterculiicola</i> (T) (NR137897)    | 100            |
|                      | Y2HESO711 | JX238992          |                 |              |                |                    | <i>Penicillium rudallense</i> (T) (NR137898 )      | 100            |
|                      | Y2HESO82  | JX238995          |                 |              |                |                    | <i>Penicillium pedernalense</i> (T) (NR146250)     | 99             |
|                      | Y2HESO98  | JX238998          |                 |              |                |                    | <i>Penicillium pancosmium</i> (T) (NR121506)       | 100            |
|                      | Y2HESO101 | JX238999          |                 |              |                |                    | <i>Penicillium pedernalense</i> (T) (NR146250)     | 100            |
|                      | Y2HESO131 | JX239000          |                 |              |                |                    | <i>Penicillium rudallense</i> (T) (NR137898)       | 99             |
|                      | Y2HESO152 | JX239001          |                 |              |                |                    | <i>Penicillium ludwigii</i> (T) (NR138339)         | 99             |

Table S1. Fungal isolates and their taxonomic identity from each coastal plant species

| Halophyte species | Strain    | GenBank accession | Class                | Order                                        | Family             | Genus                                        | Closest relative based on sequence homology     | Similarity (%)                            |                                                 |    |
|-------------------|-----------|-------------------|----------------------|----------------------------------------------|--------------------|----------------------------------------------|-------------------------------------------------|-------------------------------------------|-------------------------------------------------|----|
| Setaria viridis   | Y2HESV63  | JX239028          | Dothideomycetes      | Mycosphaerellales                            | Teratosphaeriaceae | <i>Neophaeothecoidea</i>                     | <i>Neophaeothecoidea proteae</i> (T) (NR157417) | 93                                        |                                                 |    |
|                   | Y2HESV32  | JX239021          |                      | Pleosporales                                 | Pleosporaceae      | <i>Exserohilum</i>                           | <i>Exserohilum turcicum</i> (T) (NR163537)      | 99                                        |                                                 |    |
|                   | Y2HESV21  | JX239020          |                      |                                              |                    |                                              | <i>Talaromyces veerkampii</i> (T) (NR153228)    | 99                                        |                                                 |    |
|                   | Y2HESV42  | JX239024          |                      |                                              |                    | <i>Talaromyces</i>                           | <i>Talaromyces funiculosus</i> (T) (NR103678.2) | 98                                        |                                                 |    |
|                   | Y2HESV91  | JX239032          | Eurotiomycetes       | Eurotiales                                   | Trichocomaceae     |                                              | <i>Talaromyces australis</i> (T) (NR147431)     | 99                                        |                                                 |    |
|                   | Y2HESV41  | JX239023          |                      |                                              |                    |                                              | <i>Aspergillus foetidus</i> (T) (NR163668)      | 99                                        |                                                 |    |
|                   | Y2HESV83  | JX239030          |                      |                                              |                    | <i>Aspergillus</i>                           | <i>Aspergillus assiutensis</i> (T) (NR151787)   | 99                                        |                                                 |    |
|                   | Y2HESV84  | JX239031          |                      |                                              |                    |                                              | <i>Aspergillus assiutensis</i> (T) (NR151787)   | 100                                       |                                                 |    |
|                   | Y2HESV11  | JX239019          |                      |                                              |                    | <i>Penicillium chalabudae</i> (T) (NR144845) | 99                                              |                                           |                                                 |    |
|                   | Y2HESV43  | JX239025          |                      |                                              |                    | <i>Penicillium chalabudae</i> (T) (NR144845) | 98                                              |                                           |                                                 |    |
|                   | Y2HESV52  | JX239026          |                      |                                              |                    | <i>Penicillium pancosmium</i> (T) (NR121506) | 100                                             |                                           |                                                 |    |
|                   | Y2HESV61  | JX239027          |                      |                                              |                    | <i>Penicillium malacaense</i> (T) (NR121344) | 100                                             |                                           |                                                 |    |
|                   | Y2HESV82  | JX239029          |                      |                                              | Sordariomycetes    | Hypocreales                                  | Nectriaceae                                     | <i>Penicillium</i>                        | <i>Penicillium guanacastense</i> (T) (NR111673) | 99 |
|                   | Y2HESV101 | JX239033          |                      |                                              |                    |                                              |                                                 |                                           | <i>Penicillium citrinum</i> (T) (NR121224)      | 97 |
|                   | Y2HESV102 | JX239034          |                      | <i>Penicillium citrinum</i> (T) (NR121224)   |                    |                                              |                                                 | 97                                        |                                                 |    |
|                   | Y2HESV103 | JX239035          |                      | <i>Penicillium meridianum</i> (T) (NR121237) |                    |                                              |                                                 | 99                                        |                                                 |    |
|                   | Y2HESV34  | JX239022          | Ophiocordycipitaceae | <i>Tolypocladium</i>                         |                    |                                              |                                                 | <i>Tolypocladium album</i> (T) (NR155018) | 99                                              |    |

Table S1. Fungal isolates and their taxonomic identity from each coastal plant species

| Halophyte species  | Strain    | GenBank accession | Class           | Order        | Family         | Genus              | Closest relative based on sequence homology | Similarity (%) |
|--------------------|-----------|-------------------|-----------------|--------------|----------------|--------------------|---------------------------------------------|----------------|
| Vitex rotundifolia | Y2HEVR21  | JX239036          | Dothideomycetes | Pleosporales | Pleosporaceae  | <i>Alternaria</i>  | <i>Alternaria destruens</i> (T) (NR137143)  | 99             |
|                    | Y2HEVR81  | JX239037          | Eurotiomycetes  | Eurotiales   | Trichocomaceae | <i>Talaromyces</i> | <i>Talaromyces pratensis</i> (T) (NR165529) | 99             |
|                    | Y2HEVR101 | JX239038          |                 |              |                |                    | <i>Talaromyces australi</i> (T) (NR147431)  | 99             |

Table S1. Fungal isolates and their taxonomic identity from each coastal plant species

| Halophyte species | Strain     | GenBank accession | Class           | Order           | Family               | Genus                  | Closest relative based on sequence homology     | Similarity (%) |
|-------------------|------------|-------------------|-----------------|-----------------|----------------------|------------------------|-------------------------------------------------|----------------|
| Zoysia sinica     | Y2HEZS1041 | JX239046          | Ascomycetes     | Incertae sedis  | Incertae sedis       | <i>Ramichloridium</i>  | <i>Ramichloridium eucleae</i> (T) (NR156590)    | 100            |
|                   | Y2HEZS74   | JX239042          |                 |                 |                      | <i>Talaromyces</i>     | <i>Talaromyces funiculosus</i> (T) (NR103678)   | 99             |
|                   | Y2HEZS11   | JX239039          | Eurotiomycetes  | Eurotiales      | Trichocomaceae       | <i>Aspergillus</i>     | <i>Aspergillus terreus</i> (T) (NR131276)       | 100            |
|                   | Y2HEZS104  | JX239045          |                 |                 |                      |                        | <i>Aspergillus terreus</i> (T) (NR131276)       | 99             |
|                   | Y2HEZS41   | JX239041          | Sordariomycetes | Hypocreales     | Nectriaceae          | <i>Penicillium</i>     | <i>Penicillium thomii</i> (T) (NR077159)        | 100            |
|                   | Y2HEZS102  | JX239044          |                 |                 |                      |                        | <i>Penicillium malacaense</i> (T) (NR121344)    | 100            |
|                   | Y2HEZS113  | JX239040          |                 | Hypocreales     | Ophiocordycipitaceae | <i>Purpureocillium</i> | <i>Purpureocillium lilacinum</i> (T) (NR165946) | 98             |
|                   | Y2HEZS94   | JX239043          |                 | Ophiostomatales | Ophiostomataceae     | <i>Ophiostoma</i>      | <i>Ophiostoma eucalyptigena</i> (T) (NR137979)  | 100            |
